# Supplementary material for: Complete genome sequence of the extremely acidophilic methanotroph isolate V4, Methylacidiphilum infernorum, a representative of the bacterial phylum Verrucomicrobia
Source: PubMed Central journal article supplement (PMC2474590; doi:10.1186/1745-6150-3-26), 2008-07-01
Supplement: 1745-6150-3-26-S1.pdf [file 1745-6150-3-26-S1.pdf]

## Supplementary Figure 1. Phylogenetic tree based on concatenated subunits of the RNA polymerase

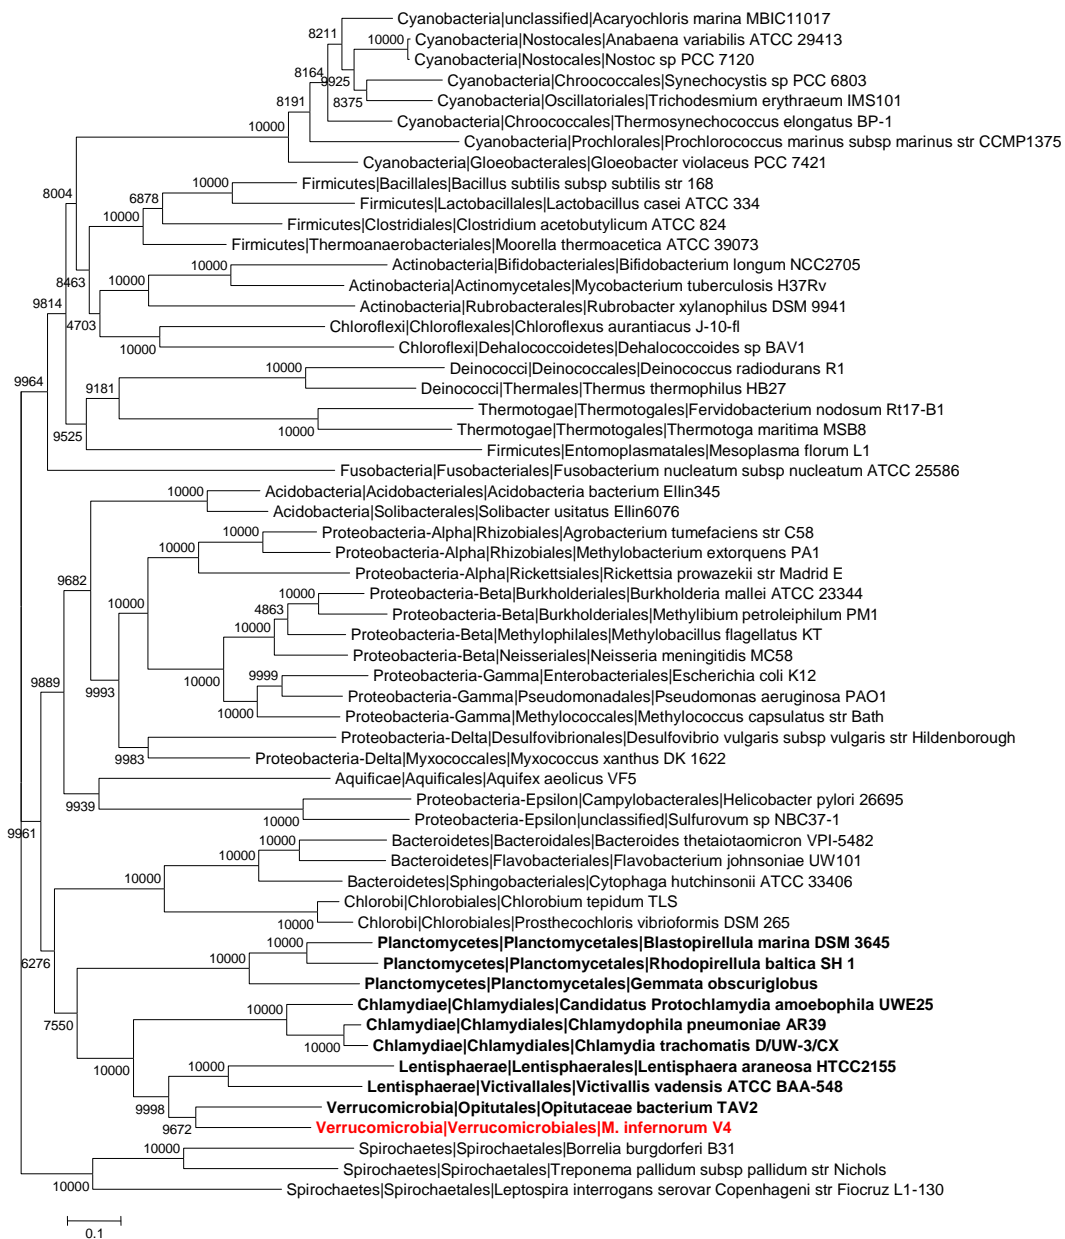

Phylogenetic tree of 59 selected bacteria (listed in the Supplementary Table 1) constructed on the basis of concatenated alignments of three subunits (alpha, beta, beta') of the DNA-dependent RNA polymerase. Bootstrap values are indicated for all branches. Three taxonomy level assignments are separated by the bar symbol. Representatives of the *Planctomycetes/Verrucomicrobia/Chlamydiae*/superphylum are shown in boldface.

**Supplementary Figure 2. Multiple alignment of the sole protein family specific for *Planctomyces/Verrucomicrobia/Chlamydiae* group.**

```

149198191|Lenti|Lentisphaera_araneosa_HTCC2155      -MDPDYSLFNLTLNHDHPEWSIEALAFICRGVDF-----NSAAPQQ----TT---
168699635|Planc|Gemmata_obscuriglobus_UQM_2246     -----MDPRILELCREDSRFAYEAYEFVSEAVTFTQ-----GRLGRTPADRGD-DGDDR-
150386448|Lenti|Victivallis_vadensis_ATCC_BAA-548 -DQQDVEQKIEELVRRDPRYRHDAYPFVANAVTFT-----VGRLPKHR-----
Minf_1886|Verru|Methylacidiphilum_inferorum        -RKRDFTTIVEEIVEKDSRYLKEYSYFVVRDGLLEYTL-----KTMGKQKHQKIE-----
153892628|Verru|Opitutaceae_bacterium_TAV2        -AELDINQVIDLIRKEDSRYPKTAYLFIREGLDQTV-----KQIKQKDSAR---AQRSL-
32472214|Planc|Rhodopirellula_baltica_SH_1        --MPSPVKAMQDLLRDDTRYKLEAYQFIREALQYAH-----ENLD----AIGPLGFGPSDDPN---SDAPR-
87308250|Planc|Blastopirellula_marina_DSM_3645     -MTDETYSDFMRMLKEDPRFKLEAYQFVREALSFGQNLFELEDDDDDEEELDLDEEMILDEEFDDEDDI EWSEPER-
166833790|Verru|Akkermansia_muciniphila_ATCC_BAA-835 -TPTTFEDAVSRIVRKDPRFAERAYSF LKDALDFT-----MQRVEERE---NGSQR-
91201105|Planc|Candidatus_Kuenenia_stuttgartiensis --MKNPWNKIKEIEKKDPRYSPMAYQFVFEALEFTT-----NMLGKTQYKA---ADSGR-
149173500|Planc|Planctomyces_maris_DSM_8797        --MGEKMTSATNLSRPKLQFHPNAYDFIFEALQQAQ-----EIFSRQATQE---DEQEBA

```

```

149198191|Lenti|Lentisphaera_araneosa_HTCC2155      DSSAQDLIHSLCLHALNEYGPLALHTLNGLNLFHKISDLIQVINLLIERKIITGIERFELENRTLNSQLCTKFPEKSLPEPH
168699635|Planc|Gemmata_obscuriglobus_UQM_2246     HVSGAELLNGACELAVREFGMMAPVVFQWGLKTTDHVGEIVFKLIKVKLLSKSDRDDPVDFSDLFDLHEALRNGFELTLR
150386448|Lenti|Victivallis_vadensis_ATCC_BAA-548  HVSALELLHGVRDYAQKEFGVLAQQVLDWGIHEAADVGSIVYSLIGAELLSASQDDSP EEFIDFPL-----IEPESE
Minf_1886|Verru|Methylacidiphilum_inferorum        QLSGKQILEGLKDYALKEFGPMSKLVLNWGWKSCRDFGQMIKNMDLYGLLTKTDMGDMKDFQKGSYFAAFVKPFLPIRS
153892628|Verru|Opitutaceae_bacterium_TAV2        HVSGRELSGLRHFALDRFGPMAKTVLNWGWIRKSDDFGEIVYNLIDYNVFSKTDTRREDFASVDFEFAFVKPFLPACR
32472214|Planc|Rhodopirellula_baltica_SH_1        HLTGQQLCEACRLYAIQDFGYLAQMVLNWLRRRTGDFGELVYNLIRIEQMRKSESDRREDFDDVYDFENAFQPKFELALS
87308250|Planc|Blastopirellula_marina_DSM_3645     HLTGQMLCEAIRNFAQQQYGLMAKTVLNSWGIETTGHFVDIVYNLIEIGMMKKSQDRREDFDDVYDFDAFVRFRIEVS
166833790|Verru|Akkermansia_muciniphila_ATCC_BAA-835 HVSGQELLEGF RDYALAQFGPMAS TVMKEWGLRNGKNGVGMVFLLEEDVFSKQPEDSLDDFKGFMSFRKAFEEPEYFQDQ
91201105|Planc|Candidatus_Kuenenia_stuttgartiensis HVTGKELLEGIKRYALKQFGFMALTVFEQWGIKEDIDFGNIVFNLVESGLMGKTE TDSKDDFKNIYNFKVFDEEYEFKGN
149173500|Planc|Planctomyces_maris_DSM_8797        HVSGQELLEGLVRELALKQFGLMTLTVFKQWGVQSTRDFGKMFVEMIEHGRMRKTEHDLREDFVDIYDFEQVFDVAVYIDTS

```

Multiple alignment was constructed using the MUSCLE program (Edgar RC: **MUSCLE: a multiple sequence alignment method with reduced time and space complexity.** *BMC Bioinformatics* 2004, **5**:113). For each sequence the GI (gene identification) number (or locus identifier in case of *M. inferorum* V4), abbreviated phylum name, and the complete organism name are indicated. Phylum abbreviations are the as follows: Lenti - *Lentisphaerae*; Planc - *Planctomycetes*; Verru - *Verrucomicrobia*;

**Supplementary Figure 3. Functional distribution of gene gain and loss as reconstructed by comparison with Last Common Ancestor of Bacteria (LBCA).**

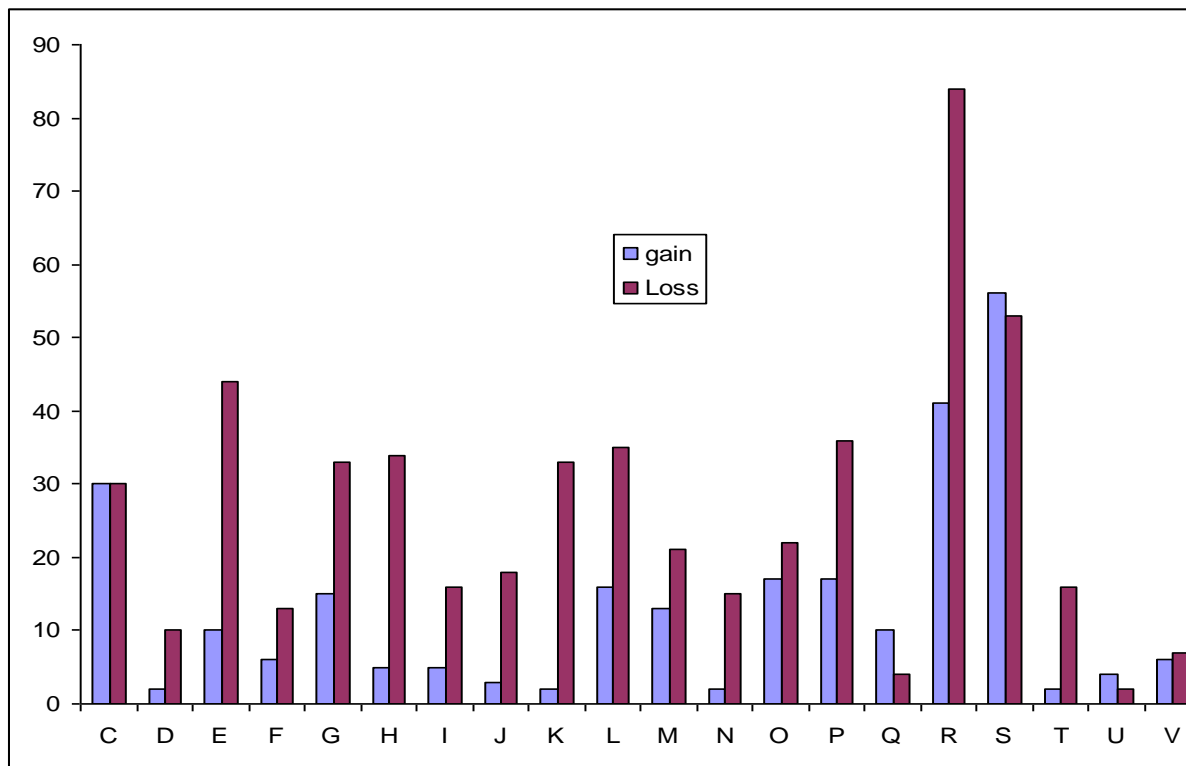

The number of genes in each category is shown on the vertical axis. Designations of functional groups (from the COG database) on the horizontal axis are as follows: J – Translation, ribosomal structure and biogenesis; K – Transcription; L – DNA replication, recombination and repair; D – Cell division and chromosome partitioning; O – Posttranslational modification, protein turnover, chaperones; M – Cell envelope and outer membrane biogenesis; N – Cell motility and secretion; P – Inorganic ion transport and metabolism; T – Signal transduction mechanisms; C – Energy production and conversion; G – Carbohydrate transport and metabolism; E – Amino acid transport and metabolism; F – Nucleotide transport and metabolism; H – Coenzyme metabolism; I – Lipid metabolism; Q – Secondary metabolites biosynthesis, transport and catabolism; V – genes involved in stress response and microbial defense.

### Supplementary Figure 4. Transporter genes in bacterial genomes.

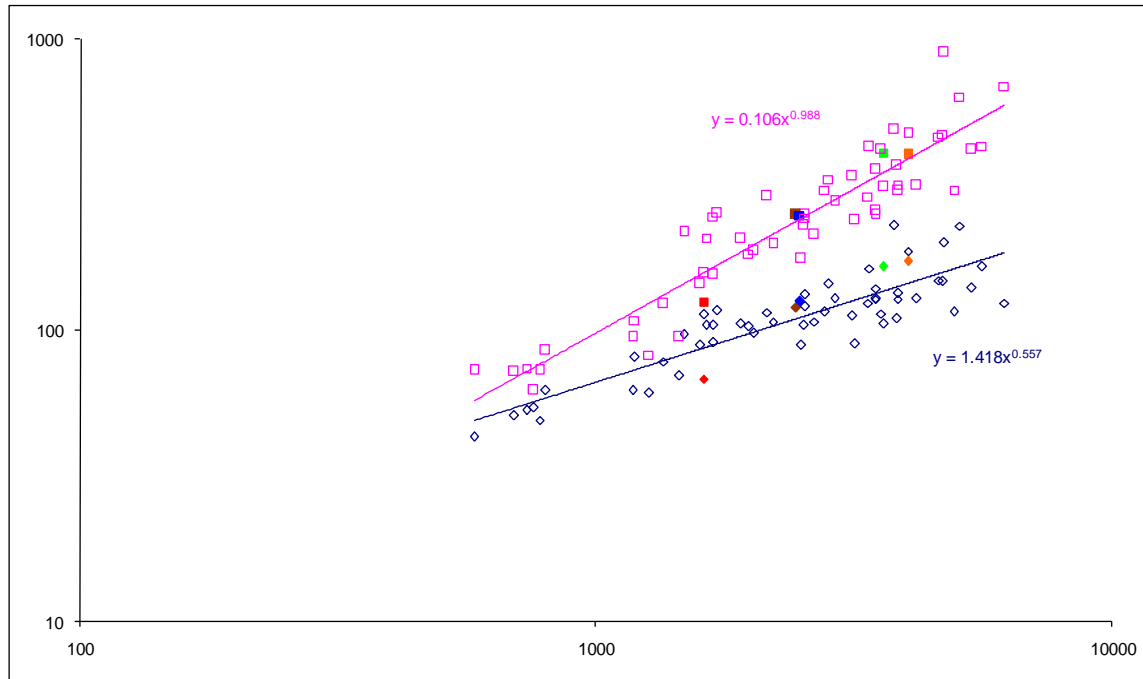

Vertical axis – the number of transporters (squares) and the number of distinct transporter families (COGs, diamonds). Horizontal axis – the genome size (the number of encoded proteins).

Red - *M. infernorum* V4; brown - *Methylobacillus flagellatus* KT; green - *Methylibium petroleiphilum* PM1; light blue - *Methylococcus capsulatus* str. Bath; orange - *Methylobacterium extorquens* PA1.

## Supplementary Figure 5. Transcriptional regulators in bacterial genomes.

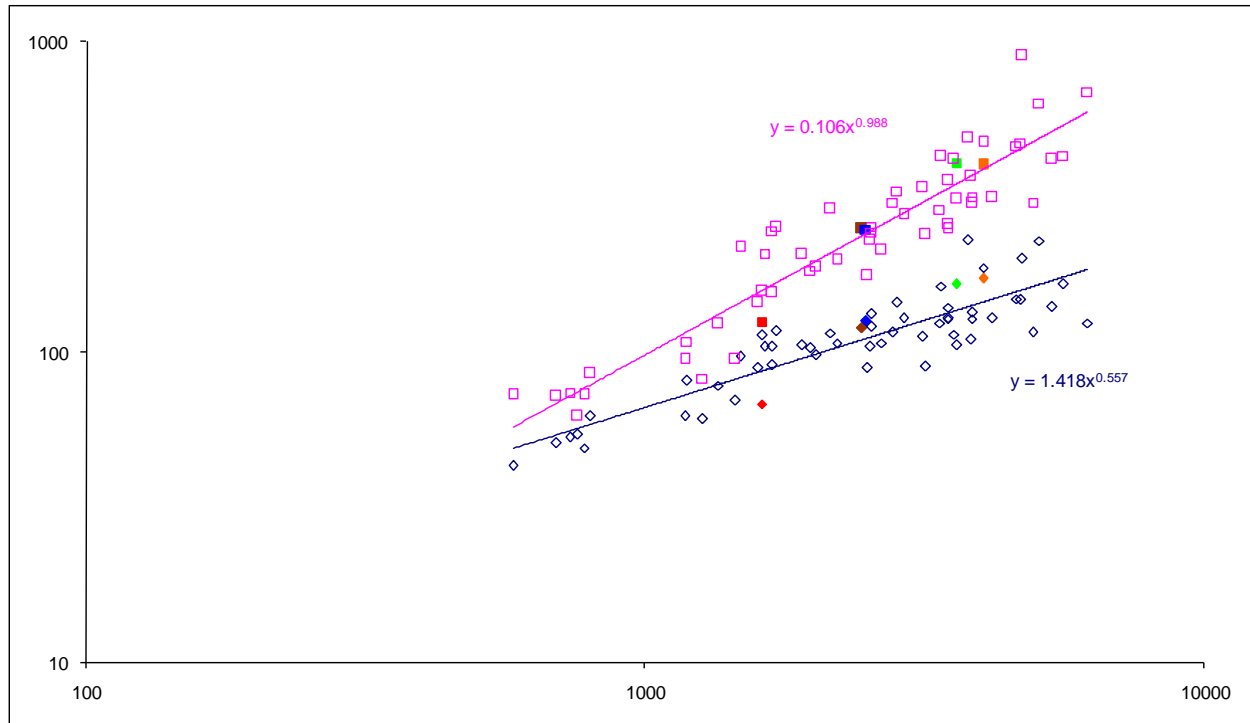

Vertical axis – the number of transporters (squares) and the number of distinct families of transcriptional regulators (COGs, diamonds). Horizontal axis – the genome size (number of encoded proteins).

Red - *M. infernorum* V4; brown - *Methylobacillus flagellatus* KT; green - *Methylibium petroleiphilum* PM1; light blue - *Methylococcus capsulatus* str. Bath; orange - *Methylobacterium extorquens* PA1.

**Supplementary Figure 6. Phylogenetic tree of beta (catalytic) subunits of H<sup>+</sup>-ATPases**

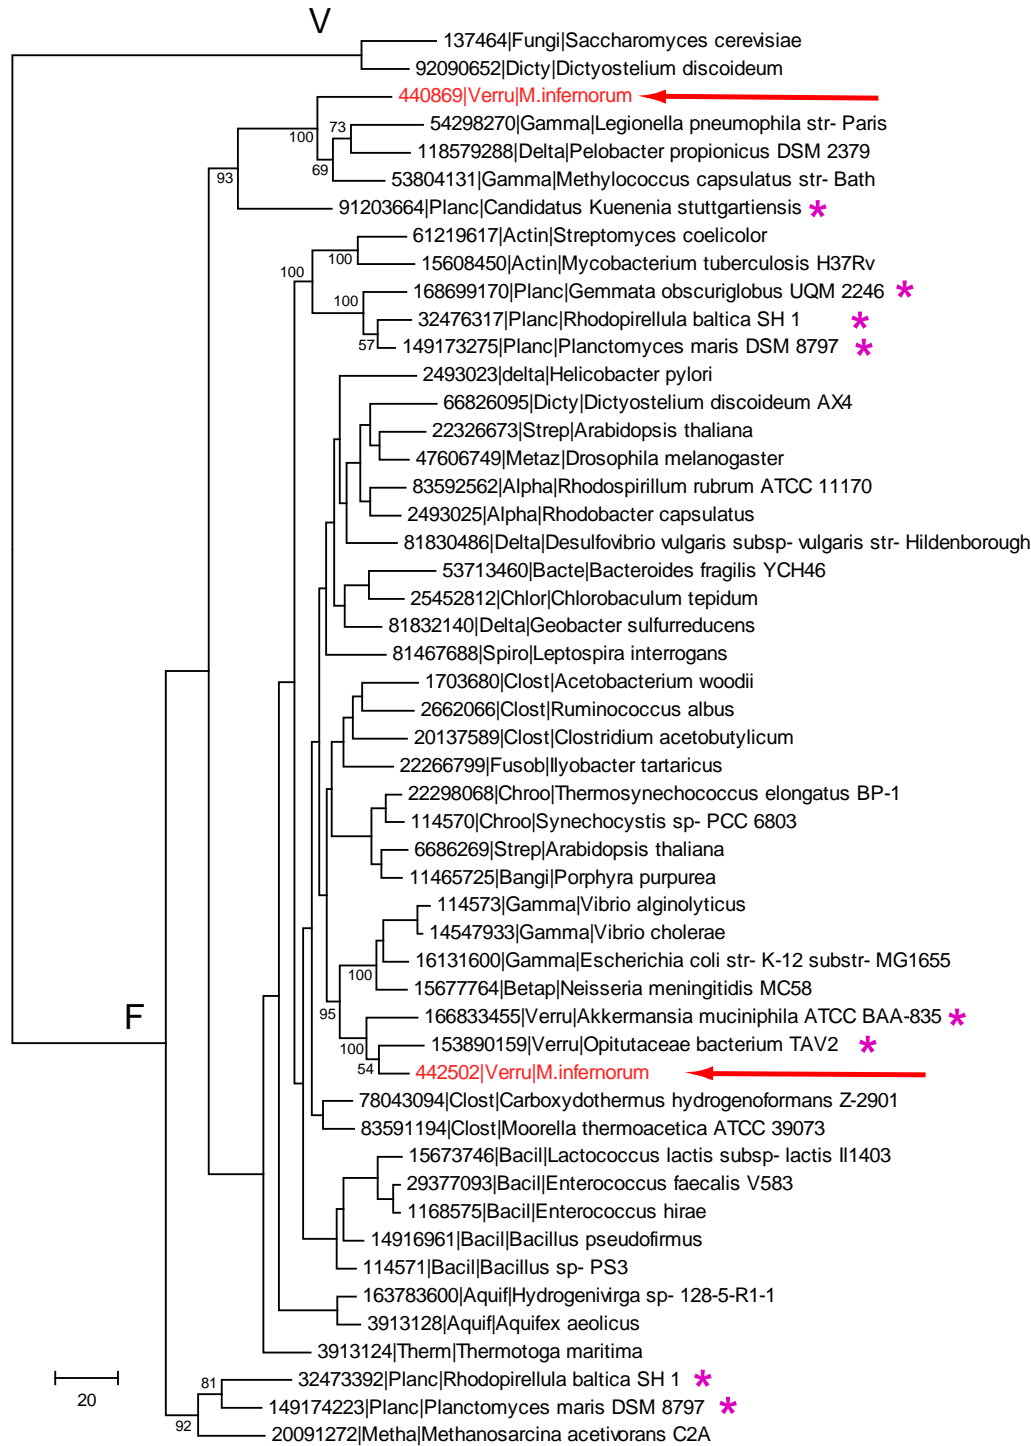

The tree was constructed as described in Methods and the legend to Supplementary Figure 1. A-subunits of V-ATPases from yeast and *D. discoideum* were used as an outgroup. Sequences from members of the PVC superphylum are indicated with asterisks; bootstrap values are shown for selected branches.

**Supplementary Table 1. The list of 59 genomes, including "*Methylococcus*" V4, used for genome comparisons and tree reconstruction in this work**

| <b>Organism<sup>a</sup></b>                                        | <b>Taxonomy</b>                            |
|--------------------------------------------------------------------|--------------------------------------------|
| <i>Aquifex aeolicus</i> VF5                                        | <i>Aquificae</i>                           |
| <i>Fervidobacterium nodosum</i> Rt17-B1                            | <i>Thermotogae</i>                         |
| <i>Thermotoga maritima</i> MSB8                                    | <i>Thermotogae</i>                         |
| <i>Mycobacterium tuberculosis</i> H37Rv                            | <i>Actinobacteria</i>                      |
| <i>Bifidobacterium longum</i> NCC2705                              | <i>Actinobacteria</i>                      |
| <i>Rubrobacter xylanophilus</i> DSM 9941                           | <i>Actinobacteria</i>                      |
| <i>Synechocystis</i> sp. PCC 6803                                  | <i>Cyanobacteria</i>                       |
| <i>Thermosynechococcus elongatus</i> BP-1                          | <i>Cyanobacteria</i>                       |
| <i>Gloeobacter violaceus</i> PCC 7421                              | <i>Cyanobacteria</i>                       |
| <i>Anabaena variabilis</i> ATCC 29413                              | <i>Cyanobacteria</i>                       |
| <i>Nostoc</i> sp. PCC 7120                                         | <i>Cyanobacteria</i>                       |
| <i>Trichodesmium erythraeum</i> IMS101                             | <i>Cyanobacteria</i>                       |
| <i>Prochlorococcus marinus</i> subsp. <i>marinus</i> str. CCMP1375 | <i>Cyanobacteria</i>                       |
| <i>Acaryochloris marina</i> MBIC11017                              | <i>Cyanobacteria</i>                       |
| <i>Chloroflexus aurantiacus</i> J-10-fl                            | <i>Chloroflexi</i>                         |
| <i>Dehalococcoides</i> sp. BAV1                                    | <i>Chloroflexi</i>                         |
| <i>Deinococcus radiodurans</i> R1                                  | <i>Deinococcus/Thermus, Deinococcales</i>  |
| <i>Thermus thermophilus</i> HB27                                   | <i>Deinococcus/Thermus, Thermales</i>      |
| <i>Bacillus subtilis</i> subsp. <i>subtilis</i> str. 168           | <i>Firmicutes, Bacilli</i>                 |
| <i>Lactobacillus casei</i> ATCC 334                                | <i>Firmicutes, Bacilli</i>                 |
| <i>Clostridium acetobutylicum</i> ATCC 824                         | <i>Firmicutes, Clostridia</i>              |
| <i>Moorella thermoacetica</i> ATCC 39073                           | <i>Firmicutes, Clostridia</i>              |
| <i>Mesoplasma florum</i> L1                                        | <i>Firmicutes, Mollicutes</i>              |
| <i>Fusobacterium nucleatum</i> subsp. <i>nucleatum</i> ATCC 25586  | <i>Fusobacteria</i>                        |
| <i>Methylobacterium extorquens</i> PA1                             | <i>Proteobacteria, Alphaproteobacteria</i> |
| <i>Agrobacterium tumefaciens</i> str. C58                          | <i>Proteobacteria, Alphaproteobacteria</i> |
| <i>Rickettsia prowazekii</i> str. Madrid E                         | <i>Proteobacteria, Alphaproteobacteria</i> |
| <i>Burkholderia mallei</i> ATCC 23344                              | <i>Proteobacteria, Betaproteobacteria</i>  |
| <i>Methylobium petroleiphilum</i> PM1                              | <i>Proteobacteria, Betaproteobacteria</i>  |

|                                                                              |                                                          |
|------------------------------------------------------------------------------|----------------------------------------------------------|
| <i>Methylobacillus flagellatus</i> KT                                        | <i>Proteobacteria, Betaproteobacteria</i>                |
| <i>Neisseria meningitidis</i> MC58                                           | <i>Proteobacteria, Betaproteobacteria</i>                |
| <i>Escherichia coli</i> K12                                                  | <i>Proteobacteria, Gammaproteobacteria</i>               |
| <i>Methylococcus capsulatus</i> str. Bath                                    | <i>Proteobacteria, Gammaproteobacteria</i>               |
| <i>Pseudomonas aeruginosa</i> PAO1                                           | <i>Proteobacteria, Gammaproteobacteria</i>               |
| <i>Desulfovibrio vulgaris</i> subsp. <i>vulgaris</i> str. Hildenborough      | <i>Proteobacteria, Deltaproteobacteria</i>               |
| <i>Myxococcus xanthus</i> DK 1622                                            | <i>Proteobacteria, Deltaproteobacteria</i>               |
| <i>Helicobacter pylori</i> 26695                                             | <i>Proteobacteria, Epsilonproteobacteria</i>             |
| <i>Sulfurovum</i> sp. NBC37-1                                                | <i>Proteobacteria, Epsilonproteobacteria</i>             |
| <i>Acidobacteria bacterium</i> Ellin345                                      | <i>Acidobacteria</i>                                     |
| <i>Solibacter usitatus</i> Ellin6076                                         | <i>Acidobacteria</i>                                     |
| <i>Bacteroides thetaiotaomicron</i> VPI-5482                                 | <i>Bacteroidetes/Chlorobi group, Bacteroidetes</i>       |
| <i>Flavobacterium johnsoniae</i> UW101                                       | <i>Bacteroidetes/Chlorobi group, Bacteroidetes</i>       |
| <i>Cytophaga hutchinsonii</i> ATCC 33406                                     | <i>Bacteroidetes/Chlorobi group, Bacteroidetes</i>       |
| <i>Chlorobium tepidum</i> TLS                                                | <i>Bacteroidetes/Chlorobi group, Chlorobi</i>            |
| <i>Prosthecochloris vibrioformis</i> DSM 265                                 | <i>Bacteroidetes/Chlorobi group, Chlorobi</i>            |
| <i>Leptospira interrogans</i> serovar <i>Copenhageni</i> str. Fiocruz L1-130 | <i>Spirochaetes</i>                                      |
| <i>Borrelia burgdorferi</i> B31                                              | <i>Spirochaetes</i>                                      |
| <i>Treponema pallidum</i> subsp. <i>pallidum</i> str. Nichols                | <i>Spirochaetes</i>                                      |
| <i>Gemmata obscuriglobus</i>                                                 | <i>Planctomycetes</i>                                    |
| <i>Planctomyces maris</i> DSM 8797                                           | <i>Planctomycetes</i>                                    |
| <i>Rhodopirellula baltica</i> SH 1                                           | <i>Planctomycetes</i>                                    |
| <i>Blastopirellula marina</i> DSM 3645                                       | <i>Planctomycetes</i>                                    |
| <i>Chlamydia trachomatis</i> D/UW-3/CX                                       | <i>Chlamydiae/Verrucomicrobia group, Chlamydiae</i>      |
| <i>Chlamydophila pneumoniae</i> AR39                                         | <i>Chlamydiae/Verrucomicrobia group, Chlamydiae</i>      |
| <i>Candidatus Protochlamydia amoebophila</i> UWE25                           | <i>Chlamydiae/Verrucomicrobia group, Chlamydiae</i>      |
| <i>Lentisphaera araneosa</i> HTCC2155                                        | <i>Chlamydiae/Verrucomicrobia group, Lentisphaerae</i>   |
| <i>Victivallis vadensis</i> ATCC BAA-548                                     | <i>Chlamydiae/Verrucomicrobia group, Lentisphaerae</i>   |
| <i>Opitutaceae bacterium</i> TAV2                                            | <i>Chlamydiae/Verrucomicrobia group, Verrucomicrobia</i> |
| <i>Methylacidiphylum infernorum</i> V4                                       | <i>Chlamydiae/Verrucomicrobia group, Verrucomicrobia</i> |

<sup>a</sup> The names of organisms with unfinished genome sequences are shaded with yellow.



**Supplementary Table 2. Representation in "*Methylacidiphylum inferorum*" V4 of 12 protein families, selected by Strous *et al.* (2006) as “signature” proteins of the *Chlamydiae/Planctomycetes* superphylum<sup>a</sup>**

| No. | Orthologous group (OG) <sup>a</sup> | Orthologous group description                                                                    | <i>Kuenenia</i> gene ID   | Chlamydiae, Planctomycetes | Other bacteria | <i>Methylokorus inferorum</i> |
|-----|-------------------------------------|--------------------------------------------------------------------------------------------------|---------------------------|----------------------------|----------------|-------------------------------|
| 1   | NOG05013                            | 60 kDa outer membrane protein                                                                    | <a href="#">kustd1987</a> | 8, 2                       | 0              | no                            |
| 2   | COG04284                            | UDP-glucose pyrophosphorylase, involved in peptidoglycan, lipid A and LPS biosynthesis           | <a href="#">kustc0526</a> | 8, 2                       | 9              | no                            |
| 3   | NOG43380                            | Polymorphic membrane protein precursor in <i>Chlamydiae</i>                                      | <a href="#">kustd1438</a> | 7, 2                       | 3              | no                            |
| 4   | NOG06624                            | Lysine- and alanine-rich, basic proteins                                                         |                           | 8,1                        | 5              | no                            |
| 5   | COG01747                            | Contains a hypothetical N-terminal domain and a transcription elongation domain GreA             | <a href="#">kustd1459</a> | 8,1                        | 5              | Minf_1252                     |
| 6   | COG03202                            | ATP/ADP translocase                                                                              |                           | 8,1                        | 9              | no                            |
| 7   | COG03952                            | Lipid A-disaccharide synthase                                                                    | <a href="#">kuste4276</a> | 8,1                        | 10             | Minf_2218                     |
| 8   | COG03880                            | Transmembrane protein with conserved CXXC motifs and a UVR domain, likely interacts with COG3869 | <a href="#">kuste3071</a> | 8, 2                       | 18             | Minf_0201                     |
| 9   | COG03869                            | Member of the ATP:guanido phosphotransferase family, likely interacts with COG3880               | <a href="#">kuste3072</a> | 8, 2                       | 18             | Minf_0242                     |
| 10  | COG02869                            | Na <sup>+</sup> -translocating NADH dehydrogenase (ubiquinone) chain C                           | <a href="#">kuste3327</a> | 8, 2                       | 19             | no                            |
| 11  | COG01347                            | Na <sup>+</sup> -translocating NADH dehydrogenase (ubiquinone) chain D                           | <a href="#">kustc0731</a> | 8, 2                       | 19             | no                            |
| 12  | COG02871                            | Na <sup>+</sup> -translocating NADH-dehydrogenase (ubiquinone) chain F                           | <a href="#">kuste3329</a> | 8, 2                       | 20             | no                            |

<sup>a</sup> Columns 2-6 are taken from the Supplementary Table 7 to the paper by Strous *et al.* (2006) Deciphering the evolution and metabolism of an anammox bacterium from a community genome, *Nature* **440**, 790-794. The 2<sup>nd</sup> column lists protein family codes in the STRING (<http://string.embl.de>) database. The 5<sup>th</sup> and 6<sup>th</sup> columns list the number of chlamydial (out of 8), planctomycetal (out of 2) and other bacterial (out of 157) genomes that encode members of the corresponding family.

**Supplementary Table 3. Metabolic reconstruction of “*Methyloacidophilum infernorum*” V4**

| COG no. | Enzyme                                                             | EC no.      | Gene    | Pathway                                             | Step | Minf locus |
|---------|--------------------------------------------------------------------|-------------|---------|-----------------------------------------------------|------|------------|
| COG0686 | Alanine dehydrogenase                                              | EC 1.4.1.1  | ald     | Alanine biosynthesis                                | 1    | Minf_1758  |
| COG0607 | Rhodanese-related sulfurtransferase                                |             | pspE    | Alanine biosynthesis                                | 1    | Minf_0494  |
| COG5016 | Pyruvate/oxaloacetate carboxyltransferase                          |             | -       | Anaplerotic reaction providing intermediates of TCA |      |            |
| COG2352 | Phosphoenolpyruvate carboxylase                                    | EC 4.1.1.31 | Ppc     | Anaplerotic reaction providing intermediates of TCA |      | Minf_1739  |
| COG1038 | Pyruvate carboxylase                                               | EC 6.4.1.1  | PycA    | Anaplerotic reaction providing intermediates of TCA |      |            |
| COG1246 | N-acetylglutamate synthase                                         |             | argA_2  | Arginine biosynthesis                               | 1    | Minf_0290  |
| COG0548 | Acetylglutamate kinase                                             | EC 2.3.1.1  | argB    | Arginine biosynthesis                               | 2    | Minf_0290  |
| COG0002 | Acetylglutamate semialdehyde dehydrogenase                         | EC 1.2.1.38 | argC    | Arginine biosynthesis                               | 3    | Minf_2363  |
| COG4992 | Ornithine/acetylornithine aminotransferase                         |             | -       | Arginine biosynthesis                               | 4    |            |
| COG0160 | 4-aminobutyrate aminotransferase                                   | EC 2.6.1.11 | argD    | Arginine biosynthesis                               | 4    | Minf_1007  |
| COG0624 | Acetylornithine deacetylase/Succinyl-diaminopimelate desuccinylase | EC 3.5.1.6  | argE    | Arginine biosynthesis                               | 5    | Minf_0405  |
| COG1364 | N-acetylglutamate synthase                                         | EC 2.3.1.1  | argJ    | Arginine biosynthesis                               | 5    | Minf_2362  |
| COG0078 | Ornithine carbamoyltransferase                                     | EC 2.1.3.3  | argF    | Arginine biosynthesis                               | 6    | Minf_2359  |
| COG0137 | Argininosuccinate synthase                                         | EC 6.3.4.5  | argG    | Arginine biosynthesis                               | 7    | Minf_1536  |
| COG0165 | Argininosuccinate lyase                                            | EC 4.3.2.1  | argH    | Arginine biosynthesis                               | 8    | Minf_2428  |
| COG0505 | Carbamoylphosphate synthase small subunit                          | EC 6.3.5.5  | carA    | Arginine biosynthesis                               | 9    | Minf_1562  |
| COG0458 | Carbamoylphosphate synthase large subunit                          | EC 6.3.5.5  | carB    | Arginine biosynthesis                               | 9    | Minf_1932  |
| COG2876 | 3-deoxy-D-arabino-heptulosonate 7-phosphate synthase               | EC 2.5.1.54 | aroA    | Aromatic acids biosynthesis                         | 1    |            |
| COG3200 | 3-deoxy-D-arabino-heptulosonate 7-phosphate synthase               |             | aroG    | Aromatic acids biosynthesis                         | 1    |            |
| COG0722 | 3-deoxy-D-arabino-heptulosonate 7-phosphate synthase               | EC 2.5.1.54 | aroG    | Aromatic acids biosynthesis                         | 1    | Minf_1352  |
| COG0337 | 3-dehydroquinate synthetase                                        | EC 4.2.3.4  | aroB    | Aromatic acids biosynthesis                         | 2    | Minf_0907  |
| COG0710 | 3-dehydroquinate dehydratase                                       | EC 4.2.1.10 | aroD    | Aromatic acids biosynthesis                         | 3    | Minf_1713  |
| COG0757 | dehydroquinate dehydratase II                                      | EC 4.2.1.10 | sll1112 | Aromatic acids biosynthesis                         | 3    |            |

|         |                                                          |              |              |                                       |    |           |
|---------|----------------------------------------------------------|--------------|--------------|---------------------------------------|----|-----------|
| COG0169 | Shikimate 5-dehydrogenase                                | EC 1.1.1.25  | aroE         | Aromatic acids biosynthesis           | 4  | Minf_2478 |
| COG0703 | Shikimate kinase                                         | EC 2.7.1.71  | aroK         | Aromatic acids biosynthesis           | 5  | Minf_0185 |
| COG1685 | Archaeal shikimate kinase                                |              | MJ1440       | Aromatic acids biosynthesis           | 5  |           |
| COG0128 | 5-enolpyruvylshikimate-3-phosphate synthase              | EC 2.5.1.19  | aroA         | Aromatic acids biosynthesis           | 6  | Minf_1047 |
| COG0082 | Chorismate synthase                                      | EC 4.2.3.5   | aroC         | Aromatic acids biosynthesis           | 7  | Minf_0184 |
| COG1605 | Chorismate mutase                                        | EC 5.4.99.5  | aroH, pheA_1 | Aromatic acids biosynthesis           | 8  | Minf_1711 |
| COG0077 | Prephenate dehydratase                                   | EC 4.2.1.51  | pheA_2       | Aromatic acids biosynthesis           | 9  | Minf_0961 |
| COG0287 | Prephenate dehydrogenase                                 | EC 1.3.1.12  | tyrA_2       | Aromatic acids biosynthesis           | 9  | Minf_0205 |
| COG0079 | Histidinol-phosphate/aromatic aminotransferase           | EC 2.6.1.5   | hisC         | Aromatic acids biosynthesis           | 10 | Minf_0206 |
| COG1448 | Aspartate/tyrosine/aromatic aminotransferase             | EC 2.6.1.1   | tyrB         | Aromatic acids biosynthesis           | 10 |           |
| COG0436 | Aspartate/tyrosine/aromatic aminotransferase             | EC 2.6.1.1   | -            | Aspartate and Asparagine biosynthesis | 1  | Minf_0281 |
| COG0029 | Aspartate oxidase                                        | EC 1.4.3.16  | nadB         | Aspartate and Asparagine biosynthesis | 1  | Minf_0927 |
| COG2502 | Asparagine synthetase A                                  | EC 6.3.1.1   | asnA         | Aspartate and Asparagine biosynthesis | 2  |           |
| COG0367 | Asparagine synthase                                      | EC 6.3.5.4   | asnB         | Aspartate and Asparagine biosynthesis | 2  |           |
| COG1424 | Pimeloyl-CoA synthetase                                  | EC 6.2.1.14  | BS_bioW      | Biotin biosynthesis                   | 1  |           |
| COG1042 | Acyl-CoA synthetase                                      |              | PA1017       | Biotin biosynthesis                   | 1  | Minf_0021 |
| COG0156 | 7-keto-8-aminopelargonate synthetase                     | EC 2.3.1.29  | bioF         | Biotin biosynthesis                   | 2  | Minf_1454 |
| COG0161 | Adenosylmethionine-8-amino-7-oxonanoate aminotransferase | EC 2.6.1.18  | bioA         | Biotin biosynthesis                   | 3  | Minf_1453 |
| COG0132 | Dethiobiotin synthetase                                  | EC 6.3.3.3   | bioD         | Biotin biosynthesis                   | 4  | Minf_1148 |
| COG0502 | Biotin synthase                                          | EC 2.8.1.6   | bioB         | Biotin biosynthesis                   | 5  | Minf_1134 |
| COG0340 | Biotin-(acetyl-CoA carboxylase) ligase                   | EC 6.3.4.15  | birA_2       | Biotin biosynthesis                   | 6  | Minf_1631 |
| COG2038 | NaMN:DMB phosphoribosyltransferase                       | EC 2.4.2.21  | cobT         | Cobalamine/B12 biosynthesis           | 1  |           |
| COG0007 | Uroporphyrinogen-III methylase                           | EC 2.1.1.107 | cysG_2/cobA  | Cobalamine/B12 biosynthesis           | 2  | Minf_2186 |
| COG2243 | Precorrin-2 methylase                                    | EC 2.1.1.130 | cbiL/cobI    | Cobalamine/B12 biosynthesis           | 3  |           |
| COG0155 | Sulfite reductase, beta subunit                          | EC 1.7.7.1   | -/cobG       | Cobalamine/B12 biosynthesis           | 4  | Minf_1679 |
| COG1010 | Precorrin-3B methylase                                   | EC 2.1.1.131 | cbiH/cobJ    | Cobalamine/B12 biosynthesis           | 5  |           |
| COG2875 | Precorrin-4 methylase                                    | EC 2.1.1.133 | cbiF/cobM    | Cobalamine/B12 biosynthesis           | 6  |           |
| COG2243 | Precorrin-2 methylase                                    | EC 2.1.1.130 | -/cobF       | Cobalamine/B12 biosynthesis           | 7  |           |
| COG2099 | Precorrin-6x reductase                                   | EC 1.3.1.54  | cbiJ/cobK    | Cobalamine/B12 biosynthesis           | 8  |           |
| COG2241 | Precorrin-6B methylase 1                                 | EC 2.1.1.132 | cbiE/cobL_1  | Cobalamine/B12 biosynthesis           | 9  |           |
| COG2242 | Precorrin-6B methylase 2                                 | EC 1.-.-.-   | cbiT/cobL_2  | Cobalamine/B12 biosynthesis           | 9  |           |

|         |                                                                              |              |           |                             |    |           |
|---------|------------------------------------------------------------------------------|--------------|-----------|-----------------------------|----|-----------|
| COG2082 | Precorrin isomerase                                                          | EC 5.4.1.2   | cbiC/cobH | Cobalamine/B12 biosynthesis | 10 |           |
| COG1797 | Cobyric acid a,c-diamide synthase                                            | EC 6.3.5.9   | cbiA/cobB | Cobalamine/B12 biosynthesis | 11 |           |
| COG1429 | Cobalamin biosynthesis protein CobN                                          | EC 6.6.1.2   | -/cobN    | Cobalamine/B12 biosynthesis | 12 |           |
| COG2109 | ATP:corrino adenosyltransferase                                              | EC 2.5.1.17  | cobA/cobO | Cobalamine/B12 biosynthesis | 13 |           |
| COG1492 | Cobyric acid synthase                                                        | EC 6.3.5.10  | cbiP/cobQ | Cobalamine/B12 biosynthesis | 14 |           |
| COG1270 | Cobalamin biosynthesis protein CobD/CbiB                                     | EC 6.3.1.10  | cbiB/cobD | Cobalamine/B12 biosynthesis | 15 |           |
| COG2087 | Adenosyl cobinamide kinase/adenosyl cobinamide phosphate guanylyltransferase | EC 2.7.1.156 | cobU      | Cobalamine/B12 biosynthesis | 16 |           |
| COG2266 | GTP:adenosylcobinamide-phosphate guanylyltransferase                         |              | cobY      | Cobalamine/B12 biosynthesis | 16 |           |
| COG0368 | Cobalamin-5-phosphate synthase                                               | EC 2.7.8.26  | cobS      | Cobalamine/B12 biosynthesis | 17 |           |
| COG1045 | Serine acetyltransferase                                                     | EC 2.3.1.30  | cysE      | Cysteine biosynthesis       | 1  | Minf_2477 |
| COG0110 | Acetyltransferase                                                            |              | WbbJ      | Cysteine biosynthesis       | 1  |           |
| COG0031 | Cysteine synthase                                                            | EC 2.5.1.47  | cysK,cysM | Cysteine biosynthesis       | 2  | Minf_0228 |
| COG0403 | Glycine cleavage system protein P, N-terminal domain                         | EC 1.4.4.2   | gcvP_1    | Degradation of glycine      | 1  |           |
| COG1003 | Glycine cleavage system protein P, C-terminal domain                         | EC 1.4.4.2   | gcvP_2    | Degradation of glycine      | 1  | Minf_2170 |
| COG1249 | Dihydrolipoamide dehydrogenase                                               | EC 1.6.1.1   | lpd       | Degradation of glycine      | 2  | Minf_0069 |
| COG0509 | Glycine cleavage system H protein                                            |              | gcvH      | Degradation of glycine      | 2  | Minf_2168 |
| COG0404 | Glycine cleavage system T protein                                            | EC 2.1.2.10  | gcvT      | Degradation of glycine      | 2  | Minf_2167 |
| COG0364 | Glucose-6-phosphate 1-dehydrogenase                                          | EC 1.1.1.49  | zwf       | Entner-Doudoroff pathway    | 1  | Minf_0262 |
| COG0363 | 6-phosphogluconolactonase/Glucosamine-6-phosphate isomerase/deaminase        | EC 3.1.1.31  | nagB      | Entner-Doudoroff pathway    | 2  | Minf_1495 |
| COG0129 | Phosphogluconate dehydratase                                                 | EC 4.2.1.9   | ilvD      | Entner-Doudoroff pathway    | 3  | Minf_2260 |
| COG0800 | 2-keto-3-deoxy-6-phosphogluconate aldolase                                   | EC 4.1.2.14  | eda       | Entner-Doudoroff pathway    | 4  |           |
| COG0825 | Acetyl-CoA carboxylase alpha subunit                                         | EC 6.4.1.2   | accA      | Fatty acids biosynthesis    | 1  | Minf_1665 |
| COG0511 | Biotin carboxyl carrier protein                                              | EC 4.1.1.41  | accB      | Fatty acids biosynthesis    | 1  | Minf_1640 |
| COG0439 | Biotin carboxylase                                                           | EC 6.3.4.14  | accC      | Fatty acids biosynthesis    | 1  | Minf_0366 |
| COG0777 | Acetyl-CoA carboxylase beta subunit                                          | EC 6.4.1.2   | accD      | Fatty acids biosynthesis    | 1  | Minf_1668 |
| COG0331 | (acyl-carrier-protein) S-malonyltransferase                                  | EC 2.3.1.39  | fabD      | Fatty acids biosynthesis    | 2  | Minf_0433 |
| COG0332 | 3-oxoacyl-[acyl-carrier-protein] synthase III                                | EC 2.3.1.41  | fabH      | Fatty acids biosynthesis    | 3  | Minf_1216 |
| COG1028 | Dehydrogenases with different                                                | EC 1.1.1.30  | fabG      | Fatty acids biosynthesis    | 4  | Minf_0432 |

|         |                                                                          |              |        |                                      |   |           |
|---------|--------------------------------------------------------------------------|--------------|--------|--------------------------------------|---|-----------|
|         | specificities                                                            |              |        |                                      |   |           |
| COG0764 | 3-hydroxymyristoyl/3-hydroxydecanoyl-(acyl carrier protein) dehydratases | EC 4.2.1.60  | fabA   | Fatty acids biosynthesis             | 5 | Minf_2131 |
| COG0623 | Enoyl-[acyl-carrier-protein] reductase                                   | EC 1.3.1.9   | fabI   | Fatty acids biosynthesis             | 6 | Minf_1633 |
| COG0304 | 3-oxoacyl-(acyl-carrier-protein) synthase                                | EC 2.3.1.41  | fabB   | Fatty acids biosynthesis             | 7 | Minf_0430 |
| COG0183 | Acetyl-CoA acetyltransferase                                             | EC 2.3.1.9   | paaJ   | Fatty acids metabolism               | 1 |           |
| COG1250 | 3-hydroxyacyl-CoA dehydrogenase                                          | EC 1.1.1.35  | fadB   | Fatty acids metabolism               | 2 |           |
| COG1024 | Enoyl-CoA hydratase/carnithine racemase                                  | EC 4.2.1.17  | caiD   | Fatty acids metabolism               | 3 |           |
| COG1960 | Acyl-CoA dehydrogenases                                                  | EC 1.3.99.-  | caiA   | Fatty acids metabolism               | 4 |           |
| COG0236 | Acyl carrier protein                                                     |              | acpP   | Fatty acids metabolism               | 5 | Minf_0431 |
| COG0302 | GTP cyclohydrolase I                                                     | EC 3.5.4.16  | folE   | Folate biosynthesis                  | 1 |           |
| COG1469 | GTP cyclohydrolase I                                                     |              |        | Folate biosynthesis                  | 1 |           |
| COG1785 | Alkaline phosphatase                                                     | EC 3.1.3.1   | phoA   | Folate biosynthesis                  | 2 |           |
| COG1539 | Dihydroneopterin aldolase                                                | EC 4.1.2.25  | folB   | Folate biosynthesis                  | 3 | Minf_1823 |
| COG0801 | 7,8-dihydro-6-hydroxymethylpterin-pyrophosphokinase                      | EC 2.7.6.3   | folK   | Folate biosynthesis                  | 4 | Minf_0340 |
| COG0294 | Dihydropteroate synthase                                                 | EC 2.5.1.15  | folP   | Folate biosynthesis                  | 5 | Minf_1898 |
| COG0285 | Folylpolyglutamate synthase                                              | EC 6.3.2.17  | folC   | Folate biosynthesis                  | 6 | Minf_0385 |
| COG0262 | Dihydrofolate reductase                                                  | EC 1.5.1.3   | folA   | Folate biosynthesis                  | 7 |           |
| COG1866 | Phosphoenolpyruvate carboxykinase                                        | EC 4.1.1.49  | pckA   | Gluconeogenesis                      |   | Minf_0887 |
| COG0281 | Malic enzyme. NAD or NADPH dependent                                     | EC 1.1.1.38  | sfcA   | Gluconeogenesis                      |   |           |
| COG0158 | Fructose-1,6-bisphosphatase                                              | EC 3.1.3.11  | fbp    | Gluconeogenesis only                 |   | Minf_1684 |
| COG0574 | Phosphoenolpyruvate synthase/pyruvate phosphate dikinase                 | EC 2.7.9.1   | ppsA   | Gluconeogenesis only                 |   | Minf_0020 |
| COG0334 | Glutamate dehydrogenase/leucine dehydrogenase                            | EC 1.4.1.2   | gdhA   | Glutamate and Glutamine biosynthesis | 1 | Minf_1762 |
| COG0174 | Glutamine synthetase                                                     | EC 6.3.1.2   | glnA   | Glutamate and Glutamine biosynthesis | 2 | Minf_1203 |
| COG0067 | Glutamate synthase domain 1                                              | EC 1.4.7.1   | gltB_1 | Glutamate and Glutamine biosynthesis | 3 | Minf_2281 |
| COG0069 | Glutamate synthase domain 2                                              | EC :1.4.1.13 | gltB_2 | Glutamate and Glutamine biosynthesis | 3 | Minf_2281 |
| COG0070 | Glutamate synthase domain 3                                              | EC :1.4.1.13 | gltB_3 | Glutamate and Glutamine biosynthesis | 3 | Minf_2281 |
| COG0493 | NADPH-dependent glutamate synthase beta chain                            | EC 1.4.1.13  | gltD   | Glutamate and Glutamine biosynthesis | 4 | Minf_0627 |
| COG0554 | Glycerol kinase                                                          |              | glpK   | Glycerol metabolism                  |   | Minf_1703 |

|         |                                           |              |        |                            |    |           |
|---------|-------------------------------------------|--------------|--------|----------------------------|----|-----------|
| COG1929 | Glycerate kinase                          | EC 2.7.1.31  | glxK   | Glycerol metabolism        |    |           |
| COG0837 | Glucokinase                               | EC 2.7.1.2   | glk    | Glycolysis                 | 1  | Minf_2003 |
| COG0205 | 6-phosphofructokinase                     | EC 2.7.1.90  | pfkA   | Glycolysis                 | 3  | Minf_2122 |
| COG0524 | Sugar kinases, ribokinase family          | EC 2.7.1.4   | pfkB   | Glycolysis                 | 3  | Minf_1083 |
| COG0469 | Pyruvate kinase                           | EC 2.7.1.40  | pykK   | Glycolysis                 | 9  | Minf_0082 |
| COG0166 | Glucose-6-phosphate isomerase             | EC 5.3.1.9   | pgi    | Glycolysis/Gluconeogenesis | 2  | Minf_1017 |
| COG0191 | Fructose/tagatose bisphosphate aldolase   | EC 4.1.2.13  | fba    | Glycolysis/Gluconeogenesis | 4  | Minf_0287 |
| COG0149 | Triosephosphate isomerase                 | EC 5.3.1.1   | tpi    | Glycolysis/Gluconeogenesis | 4  | Minf_1031 |
| COG0057 | Glyceraldehyde-3-phosphate dehydrogenase  | EC 1.2.1.12  | gapA   | Glycolysis/Gluconeogenesis | 5  | Minf_1033 |
| COG0126 | 3-phosphoglycerate kinase                 | EC 2.7.2.3   | pgk    | Glycolysis/Gluconeogenesis | 6  | Minf_1032 |
| COG0588 | Phosphoglycerate mutase 1                 | E5.4.2.1     | gpmA   | Glycolysis/Gluconeogenesis | 7  | Minf_0600 |
| COG0406 | Fructose-2,6-bisphosphatase               | EC 2.7.1.105 | gpmB   | Glycolysis/Gluconeogenesis | 7  | Minf_1259 |
| COG0696 | Phosphoglyceromutase                      | E5.4.2.1     | yibO   | Glycolysis/Gluconeogenesis | 7  |           |
| COG0148 | Enolase                                   | EC 4.2.1.11  | eno    | Glycolysis/Gluconeogenesis | 8  | Minf_0312 |
| COG2224 | Isocitrate lyase                          | EC 4.1.3.1   | aceA   | Glyoxylate bypass          | 1  | Minf_0891 |
| COG2225 | Malate synthase                           | EC 2.3.3.9   | aceB   | Glyoxylate bypass          | 2  | Minf_0892 |
| COG0008 | Glutamyl- and glutaminyl-tRNA synthetases | EC 6.1.1.17  | gltX   | Heme biosynthesis          | 1  | Minf_0178 |
| COG0373 | Glutamyl-tRNA reductase                   | EC 1.2.1.-   | hemA   | Heme biosynthesis          | 2  | Minf_2188 |
| COG0001 | Glutamate-1-semialdehyde aminotransferase | EC 5.4.3.8   | hemL   | Heme biosynthesis          | 3  | Minf_1903 |
| COG0113 | Delta-aminolevulinic acid dehydratase     | EC 4.2.1.24  | hemB   | Heme biosynthesis          | 4  | Minf_1112 |
| COG0181 | Porphobilinogen deaminase                 | EC 2.5.1.61  | hemC   | Heme biosynthesis          | 5  | Minf_2187 |
| COG1587 | Uroporphyrinogen-III synthase             | EC 4.2.1.75  | hemD   | Heme biosynthesis          | 6  | Minf_2186 |
| COG1648 | Siroheme synthase                         | EC 1.3.1.76  | cysG_1 | Heme biosynthesis          | 7  |           |
| COG0007 | Uroporphyrinogen-III methylase            | EC 2.1.1.107 | cysG_2 | Heme biosynthesis          | 7  | Minf_2186 |
| COG0407 | Uroporphyrinogen-III decarboxylase        | EC 4.1.1.37  | hemE   | Heme biosynthesis          | 7  |           |
| COG0408 | Coproporphyrinogen III oxidase            | EC 1.3.3.3   | hemF   | Heme biosynthesis          | 8  |           |
| COG0635 | Coproporphyrinogen III oxidase            | EC 1.3.3.3   | hemN   | Heme biosynthesis          | 8  | Minf_0310 |
| COG0716 | Flavodoxins                               | EC 1.3.3.4   | hemG   | Heme biosynthesis          | 9  |           |
| COG1232 | Protoporphyrinogen oxidase                | EC 1.3.3.4   | hemY   | Heme biosynthesis          | 9  |           |
| COG0276 | Protoheme ferro-lyase                     | EC 4.99.1.1  | hemH   | Heme biosynthesis          | 10 |           |
| COG0462 | Phosphoribosylpyrophosphate synthetase    | EC 2.7.6.1   | prsA   | Histidine biosynthesis     | 1  | Minf_0666 |
| COG0040 | Ammonia permease                          | EC 2.4.2.17  | hisG   | Histidine biosynthesis     | 2  | Minf_0818 |
| COG0140 | Phosphoribosyl-ATP pyrophosphohydrolase   | EC 3.6.1.31  | hisI_2 | Histidine biosynthesis     | 3  |           |
| COG0139 | Phosphoribosyl-AMP cyclohydrolase         | EC 3.5.4.19  | hisI_1 | Histidine biosynthesis     | 4  | Minf_0056 |
| COG0106 | Phosphoribosylformimino-5-                | EC 5.3.1.16  | hisA   | Histidine biosynthesis     | 5  | Minf_1927 |

|         |                                                                               |             |         |                                             |    |           |
|---------|-------------------------------------------------------------------------------|-------------|---------|---------------------------------------------|----|-----------|
|         | aminoimidazole carboxamide ribonucleotide isomerase                           |             |         |                                             |    |           |
| COG0107 | Imidazoleglycerol-phosphate synthase                                          |             | hisF    | Histidine biosynthesis                      | 6  | Minf_2270 |
| COG0118 | Glutamine amidotransferase                                                    | EC 2.4.2.-  | hisH    | Histidine biosynthesis                      | 6  | Minf_1926 |
| COG0131 | Imidazoleglycerol-phosphate dehydratase                                       | EC 4.2.1.19 | hisB_2  | Histidine biosynthesis                      | 7  | Minf_2371 |
| COG0079 | Histidinol-phosphate/aromatic aminotransferase and cobyric acid decarboxylase | EC 2.6.1.5  | hisC    | Histidine biosynthesis                      | 8  | Minf_0206 |
| COG0241 | Histidinol phosphatase                                                        | EC 3.1.3.15 | Bs_ytvB | Histidine biosynthesis                      | 9  | Minf_0958 |
| COG1387 | Histidinol phosphatase                                                        | EC 3.1.3.15 | hisB_1  | Histidine biosynthesis                      | 9  | Minf_0443 |
| COG0141 | Histidinol dehydrogenase                                                      | EC 1.1.1.23 | hisD    | Histidine biosynthesis                      | 10 | Minf_0243 |
| COG1171 | Threonine dehydratase                                                         | EC 4.3.1.19 | ilvA    | Ile, Leu, Val biosynthesis                  | 1  |           |
| COG0028 | Acetolactate synthase                                                         | EC 1.2.2.2  | ilvB    | Ile, Leu, Val biosynthesis                  | 2  | Minf_2367 |
| COG0440 | Acetolactate synthase, small subunit                                          | EC 2.2.1.6  | ilvN    | Ile, Leu, Val biosynthesis                  | 2  | Minf_1745 |
| COG0059 | Ketol-acid reductoisomerase                                                   | EC 1.1.1.86 | ilvG    | Ile, Leu, Val biosynthesis                  | 3  | Minf_1744 |
| COG0129 | Dihydroxyacid dehydratase/phosphogluconate dehydratase                        | EC 4.2.1.9  | ilvD    | Ile, Leu, Val biosynthesis                  | 4  | Minf_2260 |
| COG0436 | Aspartate/tyrosine/aromatic aminotransferase                                  | EC 2.6.1.1  | avtA    | Ile, Leu, Val biosynthesis                  | 5  | Minf_0281 |
| COG0115 | Branched-chain amino acid aminotransferase                                    | EC 2.6.1.21 | ilvE    | Ile, Leu, Val biosynthesis                  | 5  | Minf_0202 |
| COG0119 | Isopropylmalate/homocitrate/citramalate synthases                             | EC 4.1.3.4  | leuA    | Ile, Leu, Val biosynthesis                  | 6  | Minf_1743 |
| COG0065 | 3_isopropylmalate dehydratase large subunit                                   | EC 4.2.1.33 | leuC    | Ile, Leu, Val biosynthesis                  | 7  | Minf_0745 |
| COG0066 | 3_isopropylmalate dehydratase small subunit                                   | EC 4.2.1.33 | leuD    | Ile, Leu, Val biosynthesis                  | 7  | Minf_1565 |
| COG0473 | Isocitrate/isopropylmalate dehydrogenase                                      | EC 1.1.1.41 | leuB    | Ile, Leu, Val biosynthesis                  | 8  | Minf_0939 |
| COG0115 | Branched-chain amino acid aminotransferase                                    | EC 2.6.1.21 | ilvE    | Ile, Leu, Val biosynthesis                  | 9  | Minf_0202 |
| COG1448 | Aspartate/tyrosine/aromatic aminotransferase                                  | EC 2.6.1.1  | tyrB    | Ile, Leu, Val biosynthesis                  | 9  |           |
| COG0578 | Glycerol-3-phosphate dehydrogenase                                            | EC 1.1.1.8  | gpsA    | Isoprenoid (branch) mevalonate biosynthesis | 1  |           |
| COG0240 | Glycerol-3-phosphate dehydrogenase                                            | EC 1.1.1.8  | gpsA    | Isoprenoid (branch) mevalonate biosynthesis | 1  | Minf_0182 |
| COG2376 | Dihydroxyacetone kinase                                                       | EC 2.7.1.29 |         | Isoprenoid (branch) mevalonate biosynthesis | 1  |           |

|         |                                                                       |              |             |                                             |   |           |
|---------|-----------------------------------------------------------------------|--------------|-------------|---------------------------------------------|---|-----------|
| COG0371 | Glycerol dehydrogenase                                                | EC 1.1.1.6   | GldA        | Isoprenoid (branch) mevalonate biosynthesis | 2 |           |
| COG1646 | GGGPS,-3-O-geranylgeranyl glyceryl phosphate synthase                 |              | -           | Isoprenoid (branch) mevalonate biosynthesis | 3 |           |
| COG1304 | L-lactate dehydrogenase                                               | EC 1.1.2.3   | - (lldD)    | Isoprenoid deoxyxylylose pathway            | 1 |           |
| COG1154 | Deoxyxylulose-5-phosphate synthase                                    | EC 2.2.1.7   | dxs         | Isoprenoid deoxyxylylose pathway            | 1 | Minf_1537 |
| COG0743 | 1-deoxy-D-xylulose 5-phosphate reductoisomerase                       | EC 1.1.1.267 | dxr (yaeM)  | Isoprenoid deoxyxylylose pathway            | 2 | Minf_1972 |
| COG0142 | Geranylgeranyl pyrophosphate synthase                                 | EC 2.5.1.1   | ispA, ispB  | Isoprenoid deoxyxylylose pathway            | 2 | Minf_0397 |
| COG1211 | 4-diphosphocytidyl-2-methyl-D-erythritol synthase                     | EC 2.7.7.60  | ispD (ygbP) | Isoprenoid deoxyxylylose pathway            | 3 | Minf_0787 |
| COG1947 | 4-diphosphocytidyl-2C-methyl-D-erythritol 2-phosphate synthase        | EC 2.7.1.148 | ispE(ychB)  | Isoprenoid deoxyxylylose pathway            | 4 | Minf_1286 |
| COG0245 | 2C-methyl-D-erythritol 2,4-cyclodiphosphate synthase                  | EC 4.6.1.12  | ispF(ygbB)  | Isoprenoid deoxyxylylose pathway            | 5 | Minf_0771 |
| COG0821 | 4-hydroxy-3-methylbut-2-en-1-yl diphosphate synthase                  | EC 1.17.4.3  | gcpE        | Isoprenoid deoxyxylylose pathway            | 6 | Minf_1968 |
| COG0761 | 4-hydroxy-3-methylbut-2-enyl diphosphate reductase                    | EC 1.17.1.2  | lytB        | Isoprenoid deoxyxylylose pathway            | 7 | Minf_2119 |
| COG3425 | 3-hydroxy-3-methylglutaryl CoA synthase                               | EC 2.3.3.10  | pksG        | Isoprenoid mevalonate biosynthesis          | 1 |           |
| COG1257 | Hydroxymethylglutaryl-CoA reductase                                   | EC 1.1.1.34  | HMG1        | Isoprenoid mevalonate biosynthesis          | 2 |           |
| COG1577 | Mevalonate kinase                                                     | EC 2.7.1.36  | ERG12       | Isoprenoid mevalonate biosynthesis          | 3 |           |
| COG3890 | Phosphomevalonate kinase                                              |              | ERG8        | Isoprenoid mevalonate biosynthesis          | 4 |           |
| COG3407 | Mevalonate pyrophosphate decarboxylase                                | EC 4.1.1.33  | -           | Isoprenoid mevalonate biosynthesis          | 5 |           |
| COG1443 | Isopentenyl diphosphate isomerase                                     | EC 5.3.3.2   | Idi         | Isoprenoid mevalonate biosynthesis          | 6 |           |
| COG0142 | Geranylgeranyl pyrophosphate synthase                                 | EC 2.5.1.1   | ispA, ispB  | Isoprenoid mevalonate biosynthesis          | 7 | Minf_0397 |
| COG1043 | Acyl-[acyl carrier protein]-UDP-N-acetylglucosamine O-acyltransferase | EC 2.3.1.129 | lpxA        | Lipid A biosynthesis                        | 1 | Minf_0223 |
| COG0774 | UDP-3-O-acyl-N-acetylglucosamine deacetylase                          | EC 3.5.1.-   | lpxC        | Lipid A biosynthesis                        | 2 | Minf_2131 |
| COG1044 | UDP-3-O-[3-hydroxymyristoyl] glucosamine N-acyltransferase            | EC 2.3.1.-   | lpxD        | Lipid A biosynthesis                        | 3 | Minf_0748 |



|         |                                                                     |              |            |                                                        |    |           |
|---------|---------------------------------------------------------------------|--------------|------------|--------------------------------------------------------|----|-----------|
| COG0763 | Lipid A disaccharide synthetase                                     | EC 2.4.1.182 | lpxB       | Lipid A biosynthesis                                   | 4  | Minf_1859 |
| COG1663 | Tetraacyldisaccharide-1-P 4'-kinase                                 | EC 2.7.1.130 | lpxK       | Lipid A biosynthesis                                   | 5  | Minf_1888 |
| COG2877 | 3-deoxy-D-manno-octulosonic acid 8-phosphate synthase               | EC 2.5.1.55  | kdsA       | Lipid A biosynthesis                                   | 6  | Minf_0954 |
| COG1212 | CMP-2-keto-3-deoxyoctulosonic acid synthetase                       | EC 2.7.7.38  | kdsB       | Lipid A biosynthesis                                   | 7  | Minf_0956 |
| COG1519 | 3-deoxy-D-manno-octulosonic-acid transferase                        | EC 2.-.-.-   | kdtA       | Lipid A biosynthesis                                   | 8  | Minf_1736 |
| COG1560 | Lauroyl/myristoyl acyltransferase                                   | EC 2.3.1.-   | htrB, msbB | Lipid A biosynthesis                                   | 9  |           |
| COG0320 | Lipoate synthase                                                    |              | lipA       | Lipoic acid biosynthesis                               | 1  | Minf_1525 |
| COG0321 | Lipoate-protein ligase B                                            |              | lipB       | Lipoic acid/protein (protein lipoylation) biosynthesis | 2  |           |
| COG0095 | Lipoate-protein ligase A                                            |              | lplA       | Lipoic acid/protein (protein lipoylation) biosynthesis | 2  | Minf_1759 |
| COG0119 | Isopropylmalate/homocitrate/citramalate synthases                   | EC 4.1.3.4   | lysS       | Lysine biosynthesis – alpha amino adipate pathway      | 1  | Minf_1743 |
| COG0065 | 3-isopropylmalate dehydratase large subunit                         | EC 4.2.1.33  | lysT       | Lysine biosynthesis – alpha amino adipate pathway      | 2  | Minf_0745 |
| COG0066 | 3-isopropylmalate dehydratase small subunit                         | EC 4.2.1.33  | lysU       | Lysine biosynthesis – alpha amino adipate pathway      | 2  | Minf_1565 |
| COG0189 | Glutathione synthase                                                | EC 6.3.2.3   | lysX       | Lysine biosynthesis – alpha amino adipate pathway      | 5  |           |
| COG0548 | Acetylglutamate kinase                                              | EC 2.3.1.1   | lysZ       | Lysine biosynthesis – alpha amino adipate pathway      | 6  | Minf_0290 |
| COG0002 | Acetylglutamate semialdehyde dehydrogenase                          | EC 1.2.1.38  | lysY/ArdC1 | Lysine biosynthesis – alpha amino adipate pathway      | 7  | Minf_2363 |
| COG4992 | Ornithine/acetylornithine aminotransferase                          |              | argD, lysJ | Lysine biosynthesis – alpha amino adipate pathway      | 8  | Minf_0947 |
| COG0624 | Acetylornithine deacetylase/ Succinyl-diaminopimelate desuccinylase | EC 3.5.1.6   | argE       | Lysine biosynthesis – alpha amino adipate pathway      | 9  | Minf_0405 |
|         | Function unclear                                                    | #N/A         | lysW       | Lysine biosynthesis – alpha amino adipate pathway      | 10 |           |
| COG0527 | Aspartokinases                                                      | EC 2.7.2.4   | lysC       | Lysine biosynthesis – diaminopimelate pathway          | 1  | Minf_2090 |
| COG0136 | Aspartate-semialdehyde dehydrogenase                                | EC 1.2.1.11  | asd        | Lysine biosynthesis – diaminopimelate pathway          | 2  | Minf_1460 |
| COG0329 | Dihydrodipicolinate synthase/N-acetylneuraminate lyase              | EC 4.1.3.3   | dapA       | Lysine biosynthesis – diaminopimelate pathway          | 3  | Minf_1924 |
| COG0289 | Dihydrodipicolinate reductase                                       | EC 1.3.1.26  | dapB       | Lysine biosynthesis –                                  | 4  | Minf_1923 |

|         |                                                                    |              |        |                                               |    |           |
|---------|--------------------------------------------------------------------|--------------|--------|-----------------------------------------------|----|-----------|
|         |                                                                    |              |        | diaminopimelate pathway                       |    |           |
| COG2171 | Tetrahydrodipicolinate N-succinyltransferase                       | EC 2.3.1.117 | dapD   | Lysine biosynthesis – diaminopimelate pathway | 5  |           |
| COG     |                                                                    | #N/A         | dapC   | Lysine biosynthesis – diaminopimelate pathway | 6  |           |
| COG0624 | Acetylornithine deacetylase/Succinyl-diaminopimelate desuccinylase | EC 3.5.1.6   | dapE   | Lysine biosynthesis – diaminopimelate pathway | 7  | Minf_0405 |
| COG0253 | Diaminopimelate epimerase                                          | EC 5.1.1.7   | dapF   | Lysine biosynthesis – diaminopimelate pathway | 8  | Minf_1925 |
| COG0019 | Diaminopimelate decarboxylase                                      | EC 4.1.1.20  | lysA   | Lysine biosynthesis – diaminopimelate pathway | 9  | Minf_1078 |
| COG0527 | Aspartokinases                                                     | EC 2.7.2.4   | metL_1 | Methionine biosynthesis                       | 1  | Minf_2090 |
| COG0136 | Aspartate-semialdehyde dehydrogenase                               | EC 1.2.1.11  | asd    | Methionine biosynthesis                       | 2  | Minf_1460 |
| COG0460 | Homoserine dehydrogenase                                           | EC 1.1.1.3   | metL_2 | Methionine biosynthesis                       | 3  | Minf_0747 |
| COG1897 | Homoserine trans-succinylase                                       | EC 2.3.1.46  | metA   | Methionine biosynthesis                       | 4  |           |
| COG0626 | Cystathionine beta-lyase/ cystathionine gamma-synthases            | EC 2.5.1.48  | metB   | Methionine biosynthesis                       | 5  |           |
| COG0626 | Cystathionine beta-lyase/ cystathionine gamma-synthases            | EC 2.5.1.48  | metC   | Methionine biosynthesis                       | 6  |           |
| COG2021 | Homoserine acetyltransferase                                       | EC 2.3.1.31  | met2   | Methionine biosynthesis                       | 7  |           |
| COG2873 | O-acetylhomoserine sulfhydrylase                                   | EC 2.5.1.49  | met17  | Methionine biosynthesis                       | 8  |           |
| COG0620 | Methionine synthase II                                             | EC 2.1.1.14  | metE   | Methionine biosynthesis                       | 9  | Minf_0258 |
| COG0646 | Methionine synthase I, methyltransferase domain                    | EC 2.1.1.13  | metH_1 | Methionine biosynthesis                       | 9  | Minf_1622 |
| COG1410 | Methionine synthase I, cobalamin-binding domain                    | EC 2.1.1.13  | metH_2 | Methionine biosynthesis                       | 9  |           |
| COG0192 | S-adenosylmethionine synthetase                                    | EC 2.5.1.6   | metK   | Methionine biosynthesis                       | 10 | Minf_0670 |
| COG2896 | Molybdenum cofactor biosynthesis enzyme                            |              | moaA   | Mo Factor biosynthesis                        | 1  | Minf_1883 |
| COG0521 | Molybdopterin biosynthesis enzymes                                 |              | moaB   | Molibdopterin biosynthesis                    | 1  | Minf_0053 |
| COG0315 | Molybdenum cofactor biosynthesis enzyme                            |              | moaC   | Molibdopterin biosynthesis                    | 1  | Minf_0052 |
| COG1977 | Molybdopterin converting factor, small subunit                     |              | moaD   | Molibdopterin biosynthesis                    | 2  | Minf_1249 |
| COG0314 | Molybdopterin converting factor, large subunit                     |              | moaE   | Molibdopterin biosynthesis                    | 2  | Minf_1881 |
| COG0746 | Molybdopterin-guanine dinucleotide biosynthesis protein A          |              | mobA   | Molibdopterin biosynthesis                    | 3  | Minf_0971 |
| COG1763 | Molybdopterin-guanine dinucleotide                                 |              | mobB   | Molibdopterin biosynthesis                    | 3  | Minf_0972 |

|         |                                                             |              |         |                                   |    |           |
|---------|-------------------------------------------------------------|--------------|---------|-----------------------------------|----|-----------|
|         | biosynthesis protein                                        |              |         |                                   |    |           |
| COG0476 | Molybdopterin and thiamine biosynthesis enzyme              |              | moeB    | Molibdopterin biosynthesis        | 3  | Minf_0654 |
| COG0725 | ABC-type molybdate transport system, periplasmic component  |              | modA    | Molibdopterin biosynthesis        | 4  | Minf_0987 |
| COG4149 | ABC-type molybdate transport system, permease component     |              | modB    | Molibdopterin biosynthesis        | 4  | Minf_0988 |
| COG4148 | ABC-type molybdate transport system, ATPase component       |              | modC    | Molibdopterin biosynthesis        | 4  |           |
| COG0157 | Nicotinate-nucleotide pyrophosphorylase                     | EC 2.4.2.19  | modD    | Molibdopterin biosynthesis        | 5  | Minf_2412 |
| COG0303 | Molybdopterin biosynthesis enzyme                           |              | moeA    | Molibdopterin biosynthesis        | 5  | Minf_0973 |
| COG0521 | Molybdopterin biosynthesis enzymes                          |              | mog     | Molibdopterin biosynthesis        | 5  | Minf_0053 |
| COG0766 | UDP-N-acetylglucosamine enolpyruvyl transferase             | EC 2.5.1.7   | murA    | Mureine biosynthesis              | 1  | Minf_0426 |
| COG0812 | UDP-N-acetylmuramate dehydrogenase                          | EC 1.1.1.158 | murB    | Mureine biosynthesis              | 2  | Minf_1409 |
| COG0773 | UDP-N-acetylmuramate-alanine ligase                         | EC 6.3.2.8   | murC    | Mureine biosynthesis              | 3  | Minf_1409 |
| COG0771 | UDP-N-acetylmuramoylalanine-D-glutamate ligase              | EC 6.3.2.9   | murD    | Mureine biosynthesis              | 4  | Minf_2246 |
| COG0769 | UDP-N-acetylmuramyl tripeptide synthase                     | EC 6.3.2.13  | murE    | Mureine biosynthesis              | 5  | Minf_1415 |
| COG0770 | UDP-N-acetylmuramyl pentapeptide synthase                   | EC 6.3.2.10  | murF    | Mureine biosynthesis              | 6  | Minf_1414 |
| COG0472 | UDP-N-acetylmuramyl pentapeptide phosphotransferase         | EC 2.7.8.13  | mraY    | Mureine biosynthesis              | 7  | Minf_1413 |
| COG0707 | UDP-N-acetylglucosamine:LPS N-acetylglucosamine transferase | EC 2.4.1.227 | murG    | Mureine biosynthesis              | 8  | Minf_1632 |
| COG0796 | Glutamate racemase                                          | EC 5.1.1.3   | murI    | Mureine biosynthesis              | 9  |           |
| COG1181 | D-alanine-D-alanine ligase                                  | EC 6.3.2.4   | ddlA(B) | Mureine biosynthesis              | 10 | Minf_1408 |
| COG0787 | Alanine racemase                                            | EC 5.1.1.1   | air     | Mureine biosynthesis              | 11 | Minf_0070 |
| COG0029 | Aspartate oxidase                                           | EC 1.4.3.16  | nadB    | NAD biosynthesis                  | 1  | Minf_0927 |
| COG0379 | Quinolinate synthase                                        |              | nadA    | NAD biosynthesis                  | 2  | Minf_0006 |
| COG0157 | Nicotinate-nucleotide pyrophosphorylase                     | EC 2.4.2.19  | nadC    | NAD biosynthesis                  | 3  | Minf_2412 |
| COG1488 | Nicotinic acid phosphoribosyltransferase                    | EC 2.4.2.11  | pncB    | NAD biosynthesis                  | 4  | Minf_0838 |
| COG1057 | Nicotinic acid mononucleotide adenylyltransferase           | EC 2.7.7.18  | nadD    | NAD biosynthesis                  | 5  | Minf_1361 |
| COG0171 | NAD synthase                                                | EC 6.3.5.1   | nadE    | NAD biosynthesis                  | 6  | Minf_0725 |
| COG1056 | Nicotinamide mononucl                                       | EC 2.7.7.1   | nadR_2  | NAD biosynthesis                  | 5  |           |
| COG0028 | acetolactate synthase                                       | EC 1.2.2.2   | ilvB    | Pantothenate and CoA biosynthesis | 1  | Minf_2367 |
| COG0059 | Ketol-acid reductoisomerase                                 | EC 1.1.1.86  | ilvC    | Pantothenate and CoA biosynthesis | 2  | Minf_1744 |

|         |                                                                          |              |           |                                   |    |           |
|---------|--------------------------------------------------------------------------|--------------|-----------|-----------------------------------|----|-----------|
| COG0129 | Dihydroxyacid dehydratase/phosphogluconate dehydratase                   | EC 4.2.1.9   | ilvD      | Pantothenate and CoA biosynthesis | 3  |           |
| COG0413 | Ketopantoate hydroxymethyltransferase                                    | EC 2.1.2.11  | PanB      | Pantothenate and CoA biosynthesis | 4  | Minf_0341 |
| COG1893 | Ketopantoate reductase                                                   | EC 1.1.1.169 | PanE/apbA | Pantothenate and CoA biosynthesis | 5  | Minf_0239 |
| COG0414 | Pantothenate synthetase                                                  | EC 6.3.2.1   | PanC      | Pantothenate and CoA biosynthesis | 6  | Minf_2101 |
| COG1072 | Pantothenate kinase                                                      | EC 2.7.1.33  | CoaA      | Pantothenate and CoA biosynthesis | 7  |           |
| COG0452 | Phosphopantothenoylcysteine synthetase/decarboxylase                     |              | dfp       | Pantothenate and CoA biosynthesis | 8  | Minf_1524 |
| COG0669 | Phosphopantetheine adenylyltransferase                                   | EC 2.7.7.3   | CoaD      | Pantothenate and CoA biosynthesis | 9  | Minf_0425 |
| COG0237 | Dephospho-CoA kinase                                                     | EC 2.7.1.24  | CoaE      | Pantothenate and CoA biosynthesis | 10 | Minf_0445 |
| COG0364 | Glucose-6-phosphate 1-dehydrogenase                                      | EC 1.1.1.49  | zwf       | Pentose phosphate pathway         | 1  | Minf_0262 |
| COG0363 | 6-phosphogluconolactonase                                                | EC 3.1.1.31  | nagB      | Pentose phosphate pathway         | 2  | Minf_1495 |
| COG0362 | 6-phosphogluconate dehydrogenase                                         | EC 1.1.1.44  | gnd       | Pentose phosphate pathway         | 3  | Minf_0198 |
| COG0120 | Ribose 5-phosphate isomerase                                             | EC 5.3.1.6   | rpiA      | Pentose phosphate pathway         | 4  |           |
| COG0698 | Ribose 5-phosphate isomerase                                             | EC 5.3.1.6   | rpiB      | Pentose phosphate pathway         | 4  | Minf_0197 |
| COG0021 | Transketolase                                                            | EC 2.2.1.1   | tktA      | Pentose phosphate pathway         | 5  | Minf_1260 |
| COG0176 | Transaldolase                                                            | EC 2.2.1.2   | mipB      | Pentose phosphate pathway         | 6  | Minf_1118 |
| COG0036 | Pentose-5-phosphate-3-epimerase                                          | EC 5.1.3.1   | rpe       | Pentose phosphate pathway         | 7  | Minf_0606 |
| COG0235 | Ribulose-5-phosphate 4-epimerase                                         | EC 4.1.2.17  | araD      | Pentose phosphate pathway         | 8  |           |
| COG2937 | Glycerol-3-phosphate O-acyltransferase                                   | EC 2.3.1.15  | PlsB      | Phospholipid biosynthesis         | 1  |           |
| COG0204 | 1-acyl-sn-glycerol-3-phosphate acyltransferase                           | EC 2.3.1.51  | PlsC      | Phospholipid biosynthesis         | 2  | Minf_1048 |
| COG0575 | CDP-diglyceride synthetase                                               | EC 2.7.7.41  | CdsA      | Phospholipid biosynthesis         | 3  | Minf_0014 |
| COG1502 | Phosphatidylserine/ phosphatidyl-glycerophosphate/ cardiolipin synthases | EC 2.7.8.8   | Cls       | Phospholipid biosynthesis         | 4  |           |
| COG0688 | Phosphatidylserine decarboxylase                                         | EC 4.1.1.65  | Psd       | Phospholipid biosynthesis         | 5  | Minf_0015 |
| COG0558 | Phosphatidylglycerophosphate synthase                                    | EC 2.7.8.5   | PgsA      | Phospholipid biosynthesis         | 4' | Minf_0177 |
| COG1267 | Phosphatidylglycerophosphatase A                                         | EC 3.1.3.27  | PgpA      | Phospholipid biosynthesis         | 5' |           |
| COG1502 | Phosphatidylserine/ phosphatidyl-glycerophosphate/ cardiolipin synthases | EC 2.7.8.8   | Cls       | Phospholipid biosynthesis         | 6' |           |
| COG0671 | Membrane-associated phospholipid phosphatase                             | EC 3.1.3.27  | PgpB      | Phospholipid biosynthesis         | 7' | Minf_1207 |
| COG1246 | N-acetylglutamate synthase                                               |              | argA_2    | Proline biosynthesis              | 1  | Minf_0290 |
| COG1364 | N-acetylglutamate synthase                                               | EC 2.3.1.1   | BS_argJ   | Proline biosynthesis              | 1  | Minf_2362 |
| COG0548 | Acetylglutamate kinase                                                   | EC 2.3.1.1   | argB      | Proline biosynthesis              | 2  | Minf_0290 |
| COG0002 | Acetylglutamate semialdehyde dehydrogenase                               | EC 1.2.1.38  | argC      | Proline biosynthesis              | 3  | Minf_2363 |
| COG0160 | 4-aminobutyrate aminotransferase                                         | EC 2.6.1.11  | argD      | Proline biosynthesis              | 4  | Minf_1007 |

|         |                                                                     |              |                |                                     |    |           |
|---------|---------------------------------------------------------------------|--------------|----------------|-------------------------------------|----|-----------|
| COG0624 | Acetylornithine deacetylase/ Succinyl-diaminopimelate desuccinylase | EC 3.5.1.6   | argE           | Proline biosynthesis                | 5  | Minf_0405 |
| COG2423 | Predicted ornithine cyclodeaminase                                  | EC 4.3.1.12  | AF1665         | Proline biosynthesis                | 6  |           |
| COG0345 | Pyrroline-5-carboxylate reductase                                   | EC 1.5.1.2   | proC           | Proline biosynthesis                | 7  | Minf_0186 |
| COG0506 | Proline dehydrogenase                                               | EC 1.5.99.8  | putA_1         | Proline biosynthesis                | 8  | Minf_0717 |
| COG0014 | Gamma-glutamyl phosphate reductase                                  | EC 1.2.1.41  | proA           | Proline biosynthesis                | 9  | Minf_0809 |
| COG1012 | NAD-dependent aldehyde dehydrogenases                               | EC 1.2.1.3   | putA_2         | Proline biosynthesis                | 10 | Minf_1730 |
| COG0263 | Glutamate 5-kinase                                                  | EC 2.7.2.11  | proB           | Proline biosynthesis                | 11 | Minf_0808 |
| COG0788 | Formyltetrahydrofolate hydrolase                                    | EC 3.5.1.10  | PurU           | Purine salvage                      | 1  |           |
| COG0813 | Purine-nucleoside phosphorylase                                     | EC 2.4.2.1   | DeoD           | Purine salvage                      | 2  |           |
| COG0005 | Purine nucleoside phosphorylase                                     | EC 2.4.2.1   | Pnp            | Purine salvage                      | 2  |           |
| COG0503 | Adenine/guanine phosphoribosyltransferases                          | EC 2.4.2.7   | Apt            | Purine salvage                      | 3  | Minf_0226 |
| COG0634 | Hypoxanthine-guanine phosphoribosyltransferase                      | EC 2.4.2.8   | Hpt            | Purine salvage                      | 4  | Minf_1659 |
| COG1052 | Lactate dehydrogenase                                               | EC 1.1.1.29  | pdxB           | Pyridoxal phosphate/B6 biosynthesis | 1  | Minf_1323 |
| COG1154 | Deoxyxylulose-5-phosphate synthase                                  | EC 2.2.1.7   | dxs            | Pyridoxal phosphate/B6 biosynthesis | 2  | Minf_1537 |
| COG1995 | Pyridoxal phosphate biosynthesis protein                            | EC 1.1.1.262 | pdxA           | Pyridoxal phosphate/B6 biosynthesis | 3  | Minf_0291 |
| COG0854 | Pyridoxal phosphate biosynthesis protein                            |              | pdxJ           | Pyridoxal phosphate/B6 biosynthesis | 3  | Minf_0766 |
| COG2240 | Pyridoxal/pyridoxine/ pyridoxamine kinase                           | EC 2.7.1.35  | pdxK           | Pyridoxal phosphate/B6 biosynthesis | 4  |           |
| COG0259 | Pyridoxamine-phosphate oxidase                                      | EC 1.4.3.5   | pdxH           | Pyridoxal phosphate/B6 biosynthesis | 5  | Minf_1150 |
|         |                                                                     | #N/A         |                | Pyridoxal phosphate/B6 biosynthesis | 1  |           |
| COG1932 | Phosphoserine aminotransferase                                      | EC 2.6.1.52  | serC           | Pyridoxal phosphate/B6 biosynthesis |    |           |
| COG0214 | Pyridoxine biosynthesis enzyme                                      |              | SNZ1 (BS_yaaD) | Pyridoxal phosphate/B6 biosynthesis | 1  |           |
| COG0311 | Glutamine amidotransferase involved in pyridoxine biosynthesis      |              | SNZ2           | Pyridoxal phosphate/B6 biosynthesis | 2  |           |
| COG0505 | Carbamoylphosphate synthase small subunit                           | EC 6.3.5.5   | carA           | Pyrimidine biosynthesis             | 1  | Minf_1562 |
| COG0458 | Carbamoylphosphate synthase large                                   | EC 6.3.5.5   | carB           | Pyrimidine biosynthesis             | 1  | Minf_1932 |

|         |                                                                             |             |        |                         |    |           |
|---------|-----------------------------------------------------------------------------|-------------|--------|-------------------------|----|-----------|
|         | subunit                                                                     |             |        |                         |    |           |
| COG0540 | Aspartate carbamoyltransferase, catalytic chain                             | EC 2.1.3.2  | pyrB   | Pyrimidine biosynthesis | 2  | Minf_1564 |
| COG0418 | Dihydroorotase                                                              | E3.5.2.3    | pyrC   | Pyrimidine biosynthesis | 3  |           |
| COG0044 | Dihydroorotase                                                              | EC 3.5.2.2  | ydeZ   | Pyrimidine biosynthesis | 3  | Minf_0625 |
| COG0167 | Dihydroorotate dehydrogenase                                                | EC 1.3.3.1  | pyrD   | Pyrimidine biosynthesis | 4  | Minf_0626 |
| COG0461 | Orotate phosphoribosyltransferase                                           | EC 2.4.2.10 | pyrE   | Pyrimidine biosynthesis | 5  | Minf_1893 |
| COG0284 | Orotidine-5'-phosphate decarboxylase                                        | EC 4.1.1.23 | pyrF   | Pyrimidine biosynthesis | 6  | Minf_1285 |
| COG0563 | Adenylate kinase                                                            | EC 2.7.4.3  | adk    | Pyrimidine biosynthesis | 7  | Minf_0822 |
| COG0528 | Uridylate kinase                                                            |             | pyrH   | Pyrimidine biosynthesis | 7  | Minf_1813 |
| COG0105 | Nucleoside diphosphate kinase                                               | EC 2.7.4.6  | ndk    | Pyrimidine biosynthesis | 8  | Minf_1367 |
| COG0504 | CTP synthase                                                                | EC 6.3.4.2  | pyrG   | Pyrimidine biosynthesis | 9  | Minf_0955 |
| COG0295 | Cytidine deaminase                                                          | EC 3.5.4.5  | Cdd    | Pyrimidine salvage      | 1  |           |
| COG0402 | Cytosine deaminase                                                          | EC 3.5.4.1  | SsnA   | Pyrimidine salvage      | 2  | Minf_1455 |
| COG0035 | Uracil phosphoribosyltransferase                                            | EC 2.4.2.9  | Upp    | Pyrimidine salvage      | 3  | Minf_1111 |
| COG0572 | Uridine kinase                                                              | EC 2.7.1.19 | Udk    | Pyrimidine salvage      | 4  | Minf_1261 |
| COG0813 | Purine-nucleoside phosphorylase                                             | EC 2.4.2.1  | DeoD   | Pyrimidine salvage      | 5  |           |
| COG0213 | Thymidine phosphorylase                                                     | EC 2.4.2.2  | DeoA   | Pyrimidine salvage      | 6  |           |
| COG0208 | Ribonucleotide reductase beta subunit                                       | EC 1.17.4.1 | NrdF   | Pyrimidine salvage      | 7  | Minf_1077 |
| COG0209 | Ribonucleotide reductase alpha subunit                                      | EC 1.17.4.1 | NrdA   | Pyrimidine salvage      | 8  | Minf_1076 |
| COG0775 | Nucleoside phosphorylase                                                    | EC 3.2.2.4  | Pfs    | Pyrimidine salvage      | 9  | Minf_0400 |
| COG1435 | Thymidine kinase                                                            | EC 2.7.1.21 | Tdk    | Pyrimidine salvage      | 10 |           |
| COG0462 | Phosphoribosylpyrophosphate synthetase                                      | EC 2.7.6.1  | prsA   | Pyrimidine biosynthesis | 1  | Minf_0666 |
| COG0034 | Glutamine phosphoribosylpyrophosphate amidotransferase                      | EC 2.4.2.14 | purF   | Pyrimidine biosynthesis | 2  | Minf_1218 |
| COG0151 | Phosphoribosylamine-glycine ligase                                          | EC 6.3.4.13 | purD   | Pyrimidine biosynthesis | 3  | Minf_1728 |
| COG0299 | Folate-dependent phosphoribosyl glycineamide formyltransferase PurN         | EC 2.1.2.2  | purN   | Pyrimidine biosynthesis | 4  | Minf_0795 |
| COG0027 | Formate-dependent phosphoribosyl glycineamide formyltransferase             |             | purT   | Pyrimidine biosynthesis | 4  |           |
| COG0046 | Phosphoribosylformylglycinamide synthase, synthetase domain                 | EC 6.3.5.3  | purL_1 | Pyrimidine biosynthesis | 5  | Minf_0721 |
| COG0047 | Phosphoribosylformylglycinamide synthase, glutamine amidotransferase domain | EC 6.3.5.3  | purL_2 | Pyrimidine biosynthesis | 5  | Minf_2304 |
| COG0150 | Phosphoribosylaminoimidazole synthetase                                     | EC 6.3.3.1  | purM   | Pyrimidine biosynthesis | 6  | Minf_1219 |
| COG0026 | Phosphoribosylaminoimidazole carboxylase                                    | EC 4.1.1.21 | purK   | Pyrimidine biosynthesis | 7  | Minf_2026 |

|         |                                                                                           |              |            |                         |      |           |
|---------|-------------------------------------------------------------------------------------------|--------------|------------|-------------------------|------|-----------|
| COG0041 | Phosphoribosylcarboxyaminoimidazole mutase                                                | EC 4.1.1.21  | purE       | Pyrimine biosynthesis   | 8    | Minf_2027 |
| COG0152 | Phosphoribosylaminoimidazolesuccinocarboxamide synthase                                   | EC 6.3.2.6   | purC       | Pyrimine biosynthesis   | 9    | Minf_1401 |
| COG0015 | Adenylosuccinate lyase                                                                    | EC 4.3.2.2   | purB       | Pyrimine biosynthesis   | 10   | Minf_2302 |
| COG0138 | AICAR transformylase/IMP cyclohydrolase PurH                                              | EC 2.1.2.3   | purH       | Pyrimine biosynthesis   | 11   | Minf_1126 |
| COG0104 | Adenylosuccinate synthase                                                                 | EC 6.3.4.4   | purA       | Pyrimine biosynthesis   | 12   | Minf_0011 |
| COG0516 | IMP dehydrogenase/GMP reductase                                                           | EC 1.7.1.7   | guaB, guaC | Pyrimine biosynthesis   | 13   | Minf_0245 |
| COG0015 | Adenylosuccinate lyase                                                                    | EC 4.3.2.2   | purB       | Pyrimine biosynthesis   | 14   | Minf_2302 |
| COG0518 | GMP synthase - Glutamine amidotransferase domain                                          | EC 6.3.5.2   | guaA_1     | Pyrimine biosynthesis   | 15   | Minf_0244 |
| COG0519 | GMP synthase, PP-ATPase domain/subunit                                                    | EC 6.3.5.2   | guaA_2     | Pyrimine biosynthesis   | 15   | Minf_0244 |
| COG2609 | Pyruvate dehydrogenase complex, dehydrogenase component                                   | EC 1.2.4.1   | AceE       | Pyruvate oxidation      | 1(1) |           |
| COG0508 | Pyruvate/2-oxoglutarate dehydrogenase complex, dihydrolipoamide acyltransferase component | EC 2.3.1.12  | AceF       | Pyruvate oxidation      | 1(1) | Minf_0068 |
| COG1071 | Pyruvate/2-oxoglutarate dehydrogenase complex, dehydrogenase component                    | EC 1.2.4.1   | AcoA       | Pyruvate oxidation      | 1(1) | Minf_1006 |
| COG1249 | Pyruvate/2-oxoglutarate dehydrogenase complex, dihydrolipoamide dehydrogenase component   | EC 1.6.1.1   | Lpd        | Pyruvate oxidation      | 1(1) | Minf_0069 |
| COG1144 | Pyruvate:ferredoxin oxidoreductase                                                        | EC 1.2.7.1   | -          | Pyruvate oxidation      | 1(2) | Minf_0626 |
| COG0674 | Pyruvate:ferredoxin oxidoreductase                                                        | EC 1.2.7.1   | porA       | Pyruvate oxidation      | 1(2) |           |
| COG1013 | Pyruvate:ferredoxin oxidoreductase                                                        | EC 1.2.7.1   | porB       | Pyruvate oxidation      | 1(2) | Minf_2386 |
| COG1014 | Pyruvate:ferredoxin oxidoreductase                                                        | EC 1.2.7.1   | porG       | Pyruvate oxidation      | 1(2) | Minf_1239 |
| COG1180 | Pyruvate-formate lyase-activating enzyme                                                  |              | pflA       | Pyruvate oxidation      | 1(3) | Minf_0640 |
| COG1882 | Pyruvate-formate lyase                                                                    | EC 2.3.1.54  | pflD       | Pyruvate oxidation      | 1(3) |           |
| COG1313 | Pyruvate formate lyase activating protein                                                 |              | pflX       | Pyruvate oxidation      | 1(3) |           |
| COG3961 | Pyruvate decarboxylase                                                                    |              | -          | Pyruvate oxidation      | 1(4) | Minf_2197 |
| COG0807 | GTP cyclohydrolase II                                                                     | EC 3.5.4.25  | ribA       | Riboflavin biosynthesis | 1    | Minf_2430 |
| COG0117 | Pyrimidine deaminase                                                                      | EC 3.5.4.26  | ribD_1     | Riboflavin biosynthesis | 2    | Minf_1660 |
| COG1985 | Pyrimidine reductase, riboflavin biosynthesis                                             | EC 1.1.1.193 | ribD_2     | Riboflavin biosynthesis | 2    | Minf_1660 |
| COG0108 | 3,4-dihydroxy-2-butanone 4-phosphate synthase                                             |              | ribB       | Riboflavin biosynthesis | 3    | Minf_2430 |

|         |                                                                                  |             |         |                              |   |           |
|---------|----------------------------------------------------------------------------------|-------------|---------|------------------------------|---|-----------|
| COG1731 | Archaeal riboflavin synthase                                                     |             | MJ1184  | Riboflavin biosynthesis      | 4 |           |
| COG0307 | Riboflavin synthase alpha chain                                                  | EC 2.5.1.9  | ribC    | Riboflavin biosynthesis      | 4 | Minf_2397 |
| COG0054 | Riboflavin synthase beta-chain                                                   | EC 2.5.1.9  | ribE    | Riboflavin biosynthesis      | 4 | Minf_1664 |
| COG0111 | Phosphoglycerate dehydrogenase                                                   | EC 1.1.1.95 | serA    | Serine, glycine biosynthesis | 1 | Minf_1255 |
| COG0075 | Serine-pyruvate aminotransferase                                                 | EC 2.6.1.-  | agt1    | Serine, glycine biosynthesis | 2 | Minf_0603 |
| COG1932 | Phosphoserine aminotransferase                                                   | EC 2.6.1.52 | serC    | Serine, glycine biosynthesis | 2 |           |
| COG4359 | Methylthioadenosine recycling enzyme                                             |             | BS_ykrX | Serine, glycine biosynthesis | 3 |           |
| COG0560 | Phosphoserine phosphatase                                                        | EC 3.1.3.3  | serB    | Serine, glycine biosynthesis | 3 |           |
| COG0112 | Glycine/serine hydroxymethyltransferase                                          | EC 2.1.2.1  | glyA    | Serine, glycine biosynthesis | 4 | Minf_1669 |
| COG0175 | 3'-phosphoadenosine 5'-phosphosulfate sulfotransferase                           | EC 1.8.4.8  | cysD    | Sulfate reduction            | 1 | Minf_1878 |
| COG2895 | GTPases - Sulfate adenylate transferase                                          | EC 2.7.7.4  | cysN    | Sulfate reduction            | 1 | Minf_1880 |
| COG2046 | ATP sulfurylase                                                                  | EC 2.7.7.4  | met3    | Sulfate reduction            | 1 |           |
| COG0529 | Adenylylsulfate kinase                                                           | EC 2.7.1.25 | cysC    | Sulfate reduction            | 2 | Minf_1880 |
| COG0175 | 3'-phosphoadenosine 5'-phosphosulfate sulfotransferase                           | EC 1.8.4.8  | cysH    | Sulfate reduction            | 3 | Minf_1878 |
| COG0155 | Sulfite reductase, beta subunit                                                  | EC 1.7.7.1  | cysI    | Sulfate reduction            | 4 | Minf_1679 |
| COG0369 | Sulfite reductase, alpha subunit                                                 | EC 1.8.1.2  | cysJ    | Sulfate reduction            | 4 | Minf_0216 |
| COG0372 | Citrate synthase                                                                 | EC 2.3.3.1  | gltA    | TCA cycle                    | 1 | Minf_0334 |
| COG1048 | Aconitase A                                                                      | EC 4.2.1.3  | acnA    | TCA cycle                    | 2 | Minf_1027 |
| COG1049 | Aconitase B                                                                      | EC 4.2.1.3  | acnB    | TCA cycle                    | 2 |           |
| COG0538 | Isocitrate dehydrogenases                                                        | EC 1.1.1.42 | icd     | TCA cycle                    | 3 |           |
| COG0473 | Isocitrate/isopropylmalate dehydrogenase                                         | EC 1.1.1.41 | IDH2    | TCA cycle                    | 3 | Minf_0939 |
| COG0567 | 2-oxoglutarate dehydrogenase complex, dehydrogenase component,                   | EC 1.2.4.2  | sucA    | TCA cycle                    | 4 | Minf_0067 |
| COG0508 | Dihydrolipoamide acyltransferase,                                                | EC 2.3.1.12 | sucB    | TCA cycle                    | 4 | Minf_0068 |
| COG1249 | Dihydrolipoamide dehydrogenase                                                   | EC 1.6.1.1  | sucD    | TCA cycle                    | 4 | Minf_0069 |
| COG0045 | Succinyl-CoA synthetase, beta subunit                                            | EC 6.2.1.4  | sdhA    | TCA cycle                    | 5 | Minf_1045 |
| COG0074 | Succinyl-CoA synthetase, alpha subunit                                           | EC 6.2.1.4  | sdhB    | TCA cycle                    | 5 | Minf_1046 |
| COG1053 | Succinate dehydrogenase/fumarate reductase, flavoprotein subunit                 | EC 1.3.5.1  | fumA_1  | TCA cycle                    | 6 | Minf_0388 |
| COG0479 | Succinate dehydrogenase/fumarate reductase, Fe-S protein subunit                 | EC 1.3.5.1  | fumA_2  | TCA cycle                    | 6 | Minf_0389 |
| COG0114 | Fumarase                                                                         | EC 4.2.1.2  | fumC    | TCA cycle                    | 7 | Minf_0793 |
| COG1951 | Tartrate dehydratase alpha subunit/Fumarate hydratase class I, N-terminal domain | EC 4.2.1.2  | lpd     | TCA cycle                    | 7 |           |
| COG1838 | Tartrate dehydratase beta subunit/Fumarate hydratase class I, C-                 | EC 4.2.1.2  | sucC    | TCA cycle                    | 7 |           |



|         |                                                                                             |              |             |                            |   |           |
|---------|---------------------------------------------------------------------------------------------|--------------|-------------|----------------------------|---|-----------|
|         | terminal domain                                                                             |              |             |                            |   |           |
| COG0039 | Malate/lactate dehydrogenases                                                               | EC 1.1.1.27  | mdh         | TCA cycle                  | 8 | Minf_1373 |
| COG2055 | Malate/L-lactate dehydrogenases                                                             | EC 1.1.1.37  | ybiC        | TCA cycle                  | 8 |           |
| COG1154 | Deoxyxylulose-5-phosphate synthase                                                          | EC 2.2.1.7   | dxs         | Thiamine (B1) biosynthesis | 1 | Minf_1537 |
| COG0422 | Thiamine biosynthesis protein ThiC                                                          |              | ThiC        | Thiamine (B1) biosynthesis | 1 | Minf_0066 |
| COG0351 | Hydroxymethylpyrimidine/phosphomethylpyrimidine kinase                                      | EC 2.7.4.7   | ThiD        | Thiamine (B1) biosynthesis | 2 | Minf_1574 |
| COG2104 | Sulfur transfer protein involved in thiamine biosynthesis                                   |              | ThiS        | Thiamine (B1) biosynthesis | 2 | Minf_2025 |
| COG0352 | Thiamine monophosphate synthase                                                             | EC 2.5.1.3   | ThiE        | Thiamine (B1) biosynthesis | 3 | Minf_0367 |
| COG0476 | Dinucleotide-utilizing enzymes involved in molybdopterin and thiamine biosynthesis family 2 |              | ThiF        | Thiamine (B1) biosynthesis | 3 | Minf_0654 |
| COG0301 | Thiamine biosynthesis ATP pyrophosphatase                                                   |              | ThiI        | Thiamine (B1) biosynthesis | 3 |           |
| COG2022 | Uncharacterized enzyme of thiazol biosynthesis                                              |              | ThiG        | Thiamine (B1) biosynthesis | 4 | Minf_2404 |
| COG1060 | Thiamine biosynthesis enzyme ThiH                                                           |              | ThiH        | Thiamine (B1) biosynthesis | 4 | Minf_1916 |
| COG0611 | Thiamine monophosphate kinase                                                               | EC 2.7.4.16  | ThiL        | Thiamine (B1) biosynthesis | 4 | Minf_0073 |
| COG0352 | Thiamine monophosphate synthase                                                             | EC 2.5.1.3   | ThiE        | Thiamine (B1) biosynthesis | 5 | Minf_0367 |
| COG2145 | Hydroxyethylthiazole kinase, sugar kinase family                                            | EC 2.7.1.50  | ThiM(=ThiK) | Thiamine (B1) biosynthesis | 5 |           |
| COG1564 | Thiamine pyrophosphokinase                                                                  | EC 2.7.6.2   | TH180       | Thiamine (B1) biosynthesis | 6 |           |
| COG0611 | Thiamine monophosphate kinase                                                               | EC 2.7.4.16  | ThiL        | Thiamine (B1) biosynthesis | 6 | Minf_0073 |
| COG0527 | Aspartokinases                                                                              | EC 2.7.2.4   | thrA_1      | Threonine biosynthesis     | 1 | Minf_2090 |
| COG0136 | Aspartate-semialdehyde dehydrogenase                                                        | EC 1.2.1.11  | asd         | Threonine biosynthesis     | 2 | Minf_1460 |
| COG0460 | Homoserine dehydrogenase                                                                    | EC 1.1.1.3   | thrA_2      | Threonine biosynthesis     | 3 | Minf_0747 |
| COG0083 | Homoserine kinase                                                                           | EC 2.7.1.39  | thrB        | Threonine biosynthesis     | 4 | Minf_2410 |
| COG0498 | Threonine synthase                                                                          | EC 4.2.3.1   | thrC        | Threonine biosynthesis     | 5 | Minf_0746 |
| COG1328 | Oxygen-sensitive ribonucleoside-triphosphate reductase                                      | EC 1.17.4.2  | nrdD        | Thymidylate biosynthesis   | 1 | Minf_1076 |
| COG0717 | Deoxycytidine deaminase                                                                     | EC 3.5.4.13  | dcd         | Thymidylate biosynthesis   | 2 | Minf_0086 |
| COG0209 | Ribonucleotide reductase alpha subunit                                                      | EC 1.17.4.1  | nrdA        | Thymidylate biosynthesis   | 3 | Minf_1076 |
| COG0208 | Ribonucleotide reductase beta subunit                                                       | EC 1.17.4.1  | nrdF        | Thymidylate biosynthesis   | 4 | Minf_1077 |
| COG0105 | Nucleoside diphosphate kinase                                                               | EC 2.7.4.6   | ndk         | Thymidylate biosynthesis   | 5 | Minf_1367 |
| COG0756 | dUTPase                                                                                     | EC 3.6.1.23  | dut         | Thymidylate biosynthesis   | 6 |           |
| COG4508 | Dimeric dUTPase                                                                             |              |             | Thymidylate biosynthesis   | 6 | Minf_2265 |
| COG1351 | Predicted alternative thymidylate synthase                                                  | EC 2.1.1.148 | THY1        | Thymidylate biosynthesis   | 7 |           |

|         |                                                        |             |                |                          |    |           |
|---------|--------------------------------------------------------|-------------|----------------|--------------------------|----|-----------|
| COG0207 | Thymidylate synthase                                   | EC 2.1.1.45 | thyA           | Thymidylate biosynthesis | 7  | Minf_0110 |
| COG1531 | Uncharacterized ArCR                                   |             | -              | Thymidylate biosynthesis | 8  |           |
| COG0125 | Thymidylate kinase                                     | EC 2.7.4.9  | tmk            | Thymidylate biosynthesis | 9  | Minf_1637 |
| COG0105 | Nucleoside diphosphate kinase                          | EC 2.7.4.6  | ndk            | Thymidylate biosynthesis | 10 | Minf_1367 |
| COG2876 | 3-deoxy-D-arabino-heptulosonate 7-phosphate synthase   | EC 2.5.1.54 | aroA           | Tryptophan biosynthesis  | 1  |           |
| COG3200 | 3-deoxy-D-arabino-heptulosonate 7-phosphate synthase   |             | aroG           | Tryptophan biosynthesis  | 1  |           |
| COG0722 | 3-deoxy-D-arabino-heptulosonate 7-phosphate synthase   | EC 2.5.1.54 | aroG           | Tryptophan biosynthesis  | 1  | Minf_1352 |
| COG0337 | 3-dehydroquinate synthetase                            | EC 4.2.3.4  | aroB           | Tryptophan biosynthesis  | 2  | Minf_0907 |
| COG0710 | 3-dehydroquinate dehydratase                           | EC 4.2.1.10 | aroD           | Tryptophan biosynthesis  | 3  | Minf_1713 |
| COG0757 | 3-dehydroquinate dehydratase II                        | EC 4.2.1.10 | sll1112(aroQ)  | Tryptophan biosynthesis  | 3  |           |
| COG0169 | Shikimate 5-dehydrogenase                              | EC 1.1.1.25 | aroE           | Tryptophan biosynthesis  | 4  | Minf_2478 |
| COG0703 | Shikimate kinase                                       | EC 2.7.1.71 | aroK           | Tryptophan biosynthesis  | 5  | Minf_0185 |
| COG1685 | Archaeal shikimate kinase                              |             | MJ1440         | Tryptophan biosynthesis  | 5  |           |
| COG0128 | 5-enolpyruvylshikimate-3-phosphate synthase            | EC 2.5.1.19 | aroA           | Tryptophan biosynthesis  | 6  | Minf_1047 |
| COG0082 | Chorismate synthase                                    | EC 4.2.3.5  | aroC           | Tryptophan biosynthesis  | 7  | Minf_0184 |
| COG0512 | Anthranilate/para-aminobenzoate synthases component II | EC 4.1.3.27 | trpD_1         | Tryptophan biosynthesis  | 8  | Minf_1763 |
| COG0147 | Anthranilate/para-aminobenzoate synthases component I  | EC 4.1.3.27 | trpE           | Tryptophan biosynthesis  | 8  | Minf_1764 |
| COG0547 | Anthranilate phosphoribosyltransferase                 | EC 2.4.2.18 | trpD_2         | Tryptophan biosynthesis  | 9  | Minf_1561 |
| COG0135 | Phosphoribosylanthranilate isomerase                   | EC 5.3.1.24 | trpC_2         | Tryptophan biosynthesis  | 10 | Minf_2031 |
| COG0134 | Indole-3-glycerol phosphate synthase                   | EC 4.1.1.48 | trpC_1         | Tryptophan biosynthesis  | 11 | Minf_2032 |
| COG0159 | Tryptophan synthase alpha chain                        | EC 4.2.1.20 | trpA           | Tryptophan biosynthesis  | 12 | Minf_2278 |
| COG0133 | Tryptophan synthase beta chain                         | EC 4.2.1.20 | trpB           | Tryptophan biosynthesis  | 12 | Minf_2030 |
| COG1350 | Predicted alternative tryptophan synthase beta-subunit |             | trpB2          | Tryptophan biosynthesis  | 12 |           |
| COG2876 | 3-deoxy-D-arabino-heptulosonate 7-phosphate synthase   | EC 2.5.1.54 | aroA           | Ubiquinol biosynthesis   | 1  |           |
| COG3200 | 3-deoxy-D-arabino-heptulosonate 7-phosphate synthase   |             | aroG           | Ubiquinol biosynthesis   | 1  |           |
| COG0722 | 3-deoxy-D-arabino-heptulosonate 7-phosphate synthase   | EC 2.5.1.54 | aroG           | Ubiquinol biosynthesis   | 1  | Minf_1352 |
| COG0337 | 3-dehydroquinate synthetase                            | EC 4.2.3.4  | aroB           | Ubiquinol biosynthesis   | 2  | Minf_0907 |
| COG0710 | 3-dehydroquinate dehydratase                           | EC 4.2.1.10 | aroD           | Ubiquinol biosynthesis   | 3  | Minf_1713 |
| COG0757 | 3-dehydroquinate dehydratase II                        | EC 4.2.1.10 | aroQ (sll1112) | Ubiquinol biosynthesis   | 3  |           |

|         |                                                                |             |        |                        |    |           |
|---------|----------------------------------------------------------------|-------------|--------|------------------------|----|-----------|
| COG0169 | Shikimate 5-dehydrogenase                                      | EC 1.1.1.25 | aroE   | Ubiquinol biosynthesis | 4  | Minf_2478 |
| COG0703 | Shikimate kinase                                               | EC 2.7.1.71 | aroK   | Ubiquinol biosynthesis | 5  | Minf_0185 |
| COG1685 | Archaeal shikimate kinase                                      |             | MJ1440 | Ubiquinol biosynthesis | 5  |           |
| COG0128 | 5-enolpyruvylshikimate-3-phosphate synthase                    | EC 2.5.1.19 | aroA   | Ubiquinol biosynthesis | 6  | Minf_1047 |
| COG0082 | Chorismate synthase                                            | EC 4.2.3.5  | aroC   | Ubiquinol biosynthesis | 7  | Minf_0184 |
| COG1169 | Isochorismate synthase                                         | EC 5.4.4.2  | menF   | Ubiquinol biosynthesis | 8  |           |
| COG1165 | 2-succinyl-6-hydroxy-2,4-cyclohexadiene-1-carboxylate synthase | EC 4.1.1.71 | menD   | Ubiquinol biosynthesis | 9  |           |
| COG1441 | O-succinylbenzoate synthase                                    | EC 4.2.1.6  | menC   | Ubiquinol biosynthesis | 10 |           |
| COC0318 | Acyl-CoA synthetases/AMP-acid ligases II                       | EC 6.2.1.26 | menE   | Ubiquinol biosynthesis | 11 |           |
| COG0447 | Dihydroxynaphthoic acid synthase                               | EC 4.1.3.36 | menB   | Ubiquinol biosynthesis | 12 |           |
| COG1575 | 1,4-dihydroxy-2-naphthoate octaprenyltransferase               | EC 2.5.1.-  | menA   | Ubiquinol biosynthesis | 13 |           |
| COG0684 | Demethylmenaquinone methyltransferase                          | EC 2.1.1.-  | menG   | Ubiquinol biosynthesis | 14 |           |
| COG0505 | Carbamoylphosphate synthase small subunit                      | EC 6.3.5.5  | carA   | Urea cycle             | 1  | Minf_1562 |
| COG0458 | Carbamoylphosphate synthase large subunit                      | EC 6.3.5.5  | carB   | Urea cycle             | 1  | Minf_1932 |
| COG0078 | Ornithine carbamoyltransferase                                 | EC 2.1.3.3  | argF   | Urea cycle             | 2  | Minf_2359 |
| COG0137 | Argininosuccinate synthase                                     | EC 6.3.4.5  | argG   | Urea cycle             | 3  | Minf_1536 |
| COG0165 | Argininosuccinate lyase                                        | EC 4.3.2.1  | argH   | Urea cycle             | 4  | Minf_2428 |
| COG0010 | Arginase/agmatinase/formimionoglutamate hydrolase              | EC 3.5.3.1  | speB   | Urea cycle             | 5  |           |
